**Feminizing *Wolbachia* endosymbiont disrupts maternal sex chromosome inheritance in a butterfly species**

**Daisuke Kageyama<sup>1\*</sup>, Mizuki Ohno<sup>2</sup>, Tatsushi Sasaki<sup>2</sup>, Atsuo Yoshido<sup>2</sup>, Tatsuro Konagaya<sup>3</sup>, Akiya Jouraku<sup>1</sup>, Seigo Kuwazaki<sup>1</sup>, Hiroyuki Kanamori<sup>4</sup>, Yuichi Katayose<sup>4</sup>, Satoko Narita<sup>1,5</sup>, Mai Miyata<sup>6</sup>, Markus Riegler<sup>7</sup>, and Ken Sahara<sup>2\*</sup>**

<sup>1</sup>Institute of Agrobiological Sciences, National Agriculture and Food Research Organization, 1-2, Owashi, Tsukuba, Ibaraki 305-0854, Japan; <sup>2</sup>Laboratory of Applied Entomology, Faculty of Agriculture, Iwate University, 3-18-8, Ueda, Morioka 020-8550, Japan; <sup>3</sup>Graduate School of Science, Kyoto University, Kitashirakawa Oiwake-cho, Sakyo-ku, Kyoto 606-8502, Japan; <sup>4</sup>Institute of Crop Science, National Agriculture and Food Research Organization, 1-2, Owashi, Tsukuba, Ibaraki 305-0854, Japan; <sup>5</sup>Tsukuba Primate Research Center, National Institute of Biomedical Innovation, Health and Nutrition, 1-1, Hachimandai, Tsukuba, Ibaraki 305-0843, Japan; <sup>6</sup>Graduate School of Horticulture, Chiba University, Matsudo 648, Matsudo, Chiba 271-8510, Japan; and <sup>7</sup>Hawkesbury Institute for the Environment, Western Sydney University, Locked Bag 1797, Penrith, New South Wales 2751, Australia

**\*For correspondence:** kagymad@affrc.go.jp (DK); sahara@iwate-u.ac.jp (KS)

**Abstract** Genomes are vulnerable to selfish genetic elements that enhance their own transmission often at the expense of host fitness. Examples are cytoplasmic elements such as maternally inherited bacteria that cause feminization, male-killing, parthenogenesis and cytoplasmic incompatibility. We demonstrate, for the first time, that segregation distortion, a phenomenon so far seen only for nuclear genetic elements, can also be caused by a cytoplasmic element, the ubiquitous endosymbiotic bacterium *Wolbachia*. For *Eurema mandarina* butterfly lineages with a Z0 sex chromosome constitution, we provide direct and conclusive evidence that *Wolbachia* induces production of all-female progeny by a dual role: the compensation for the female-determining function that is absent in Z0 lineages (feminization) and the prevention of maternal sex chromosome inheritance to offspring as a specific type of segregation distortion. Therefore, our findings highlight that both sex determination and chromosome inheritance — crucially important developmental processes of higher eukaryotes — can be manipulated by cytoplasmic parasites.

## 38 Introduction

39 Genomes of sexually reproducing organisms are exposed to genetic conflicts.  
 40 For example, some genes bias reproduction towards male offspring while other  
 41 genes within the same genome may favor reproduction of more daughters.  
 42 Selfish genetic elements (SGEs), such as meiotic drivers, cytoplasmic sex ratio  
 43 distorters and transposons, are extreme examples, which enhance their own  
 44 transmission often at the expense of their hosts' fitness [1,2]. There is growing  
 45 evidence that SGEs, and their genetic conflict with host genomes, trigger  
 46 important evolutionary change and innovation in eukaryotes [2].

47 Segregation distortion (SD), also referred to as meiotic drive, is a  
 48 violation of Mendelian law as it leads to the more frequent inheritance of one  
 49 copy of a gene than the expected 50% [3,4]. A segregation distorter that sits on a  
 50 sex chromosome biases the sex ratio. For example, X-linked segregation  
 51 distorter (X drive) and Y-linked segregation distorter (Y drive) in flies (Diptera),  
 52 result in female-biased and male-biased sex ratios, respectively [4]. In  
 53 male-heterogametic species, X and Y segregation distorters are expected to be  
 54 encoded in the nuclear genome. In female-heterogametic species, however, W  
 55 chromosome and cytoplasm behave as a single linkage group and thus  
 56 distortion of sex chromosome inheritance in female-heterogametic species can  
 57 theoretically also be caused by cytoplasmic elements. Although this possibility  
 58 has previously been proposed [5,6], lack of empirical evidence questions  
 59 whether it is mechanistically possible for cytoplasmic elements to cause SD.

60 *Wolbachia pipientis* (Alphaproteobacteria), simply referred to as  
 61 *Wolbachia*, attracts significant interest in evolutionary and developmental biology

62 but also in applied fields such as pest management because it can manipulate  
63 reproduction of arthropods in various ways such as cytoplasmic incompatibility,  
64 parthenogenesis induction, feminization and male-killing [7]. Here we  
65 demonstrate for the first time that *Wolbachia* is responsible for the disruption of  
66 sex chromosome inheritance, which can also be seen as a form of segregation  
67 distortion, in any host species. We do this by providing multifaceted and  
68 conclusive evidence that in the butterfly *Eurema mandarina* *Wolbachia*-induced  
69 SD is the underlying mechanism for the production of all-female progeny. In  
70 most populations, *E. mandarina* is infected with the cytoplasmic-incompatibility  
71 (CI)-inducing *Wolbachia* strain wCI at a high prevalence of close to 100% [8,9].  
72 Hiroki et al. [10,11] first reported all-female offspring production in *E. mandarina*  
73 (then known as *Eurema hecabe* yellow type), which was considered to be due to  
74 the feminization of genetic males (ZZ) by co-infections with the *Wolbachia* strain  
75 wFem (hereafter referred to as double infection CF while single infection with  
76 wCI is referred to as C). Three observations about CF lineages supported this  
77 view, i.e., (a) antibiotic treatment of adult females led to the production of  
78 all-male offspring [10], (b) antibiotic treatment of larvae resulted in intersex  
79 adults [12] and (c) females did not have the W chromatin body [10,12]. This has  
80 recently been challenged, because it was demonstrated that CF females have  
81 only one Z chromosome and that this Z chromosome always derived from their  
82 fathers implying that a SD mechanism may be in place albeit it was not clear  
83 whether *Wolbachia* induced this SD [13]. As a consequence two novel (yet  
84 untested) hypotheses were formed, namely, that CF females have either a Z0 or  
85 a W'Z sex chromosome set (whereby W' cannot be visualized in W chromatin

assays and does not have a female-determining function), and that the disruption of Z chromosome inheritance occurs in CF lineages due to *Wolbachia* or another factor, such as those encoded by the host nucleus.

In a multifaceted approach, by combining fluorescence in situ hybridization (FISH), genome sequencing, quantitative PCR, reverse transcription PCR and antibiotic treatment, we have tested these two hypotheses and revealed that CF females are Z0, and that *Wolbachia* is the cause for both the disruption of Z chromosome inheritance and the feminization of Z0 individuals. Our results demonstrate, for the first time, *Wolbachia* as the agent that is responsible for distorted sex chromosome inheritance, and thereby highlight that cytoplasmic elements can have profound effects on oogenesis, sex chromosome inheritance and sex determination – fundamental biological processes of eukaryotes.

## Results

### All-female-producing CF females have a Z0 sex chromosome constitution

We performed FISH on *E. mandarina* chromosomes prepared from CF females, C females, and C males collected on Tanegashima Island (**Figure 1; Figure 1—figure supplement 1**). In the mitotic complement of C females, which harbor a  $2n = 62$  karyotype, genomic probes highlighted the W chromosome, with scattered signals on the other chromosomes (**Figure 2A**; see Materials and Methods for technical details). A probe for the Z-linked gene *Kettin* (*Ket*) identified the single Z chromosome in C females (**Figure 2A**), and also hybridized to the Z chromosome paired with the W chromosome in pachytene

110 bivalents (**Figure 2J**). The *Ket* probe identified two Z chromosomes in the mitotic  
 111 complement of C males (**Figure 2B**;  $2n = 62$ ). No painted W chromosome was  
 112 observed in interphase nuclei (**Figure 2H, I**), the mitotic complement (**Figure**  
 113 **2C**) and pachytene complement (**Figure 2L**) of CF females, but the *Ket* signal  
 114 appeared on the single Z chromosome in the mitotic complement (**Figure 2C**)  
 115 and Z univalent in the pachytene complement (**Figure 2L**). Based on the relative  
 116 read counts homologous to *Bombyx mori* Z-linked and autosomal genes in  
 117 females and males, our genome sequencing data support the notion that CF and  
 118 C females have one Z chromosome (**Figures 2M–O**; **Figure 2—figure**  
 119 **supplement 1**), which is consistent with genomic qPCR data based on two loci,  
 120 *Triosephosphate isomerase* (*Tpi*) and *Ket*, relative to the autosomal gene *EF-1α*  
 121 [13]. Thus, our results directly reveal the sex chromosome constitution of C  
 122 females, C males, and CF females as WZ, ZZ, and Z0, respectively. This  
 123 confirms one of two previously suggested sex chromosome constitution of CF  
 124 females [13] while it disproves another previous interpretation based on W-body  
 125 diagnosis that CF females are ZZ [10,12].

126

## 127 **All embryos oviposited by CF females are Z0**

128 We performed real-time genomic qPCR (to detect Z-linked *Tpi* or *Ket* relative to  
 129 autosomal *EF-1α*) on individual fertilized eggs, and found that C females  
 130 oviposited embryos with either one or two Z chromosomes at nearly equal  
 131 frequencies (**Figure 3A left**, **Figure 3—figure supplement 1**). In contrast, all  
 132 embryos oviposited by CF females were single Z carriers (**Figure 3A middle**;  
 133 **Figure 3—figure supplement 1**). These findings indicate that the progeny of CF

females are exclusively Z0 individuals, supporting the view that the maternal Z chromosomes are not inherited in CF lineages.

# ***Wolbachia* causes the exclusive production of Z0 embryos by CF females**

To abolish the effects of *Wolbachia*, tetracycline (tet) was administered to adult CF females previously inseminated by antibiotic-treated male offspring of C females. The Z-linked gene dose of embryos laid by these tet-treated females ranged from approximately 0.5–1.0, indicating that some embryos are Z0 and others are ZZ (**Figure 3A right, Figure 3—figure supplement 1**). This suggests that the *Wolbachia* strain wFem in CF females causes the exclusive production of gametes without sex chromosomes that then develop as Z0 embryos after fertilization. Therefore, our finding is the first empirical evidence that in a female-heterogametic species the sex-specific linkage disequilibrium can be caused by cytoplasmic elements [5,6]. Furthermore, *Wolbachia*-like structures were observed near the chromosomes in CF females while less apparent in C females and C males, and this may represent different tropism and function of wFem when contrasted with wCI (**Figure 2C**). Sixty-nine adults (15 females and 54 males) were obtained from offspring produced by five tet-treated adult CF females (**Figure 3B**). Three of these tet-treated females produced only male offspring. Exclusive production of males was previously observed in tet-treated *E. mandarina* females derived from a different population on Okinawa-jima Island, Okinawa Prefecture, Japan [10]. In this study, we obtained 15 female offspring from two broods in the first days after tet treatment; however, the mothers produced more males as the duration of tet treatment increased, and eventually

158 produced only males. Examination of the Z-linked gene dose of these offspring  
 159 by genomic qPCR showed that the females had one Z chromosome, whereas  
 160 almost all of the males had two Z chromosomes (**Figure 3C**). The nucleotide  
 161 sequences of the introns of the *Tpi* gene demonstrate that, in brood 19-1, all  
 162 females ( $n = 12$ ) were hemizygous and nine out of 10 males were heterozygous  
 163 (**Figure 3C; Figure 3—figure supplement 2**). Curiously, one male (21m) that  
 164 exhibited the lowest gene dose of *Ket* (0.588) appeared to be hemizygous  
 165 (**Figure 3C**). These results suggest that the emerged females had a Z0 sex  
 166 chromosome constitution, whereas most males had a ZZ sex chromosome  
 167 constitution, with one exception (21m) of either Z0 or ZZ' (Z' represents partial  
 168 deletion/mutation in Z). These results also demonstrate that, in principle,  
 169 tet-treated adult CF females can oviposit embryos with either a Z0 or ZZ sex  
 170 chromosome constitutions (**Figure 3A right**). However, Z0 individuals appear to  
 171 have zero or very low survival rates because few emerge as adults.

172

### 173 **Involvement of *Wolbachia* in the sex determination of *Eurema mandarina***

174 Next, we fed CF larvae a tet-containing diet. As previously observed [12], all  
 175 individuals treated in this way developed an intersex phenotype at the adult  
 176 stage, typically represented with male-like wing color and an incomplete  
 177 male-specific structure on the wing surface (**Figure 4E and H; Figure 4—figure**  
 178 **supplement 2**). The qPCR assay to assess the Z-linked gene dose revealed  
 179 that these intersexes ( $n = 23$ ) had just one Z chromosome (**Figure 4I**), and  
 180 therefore a Z0 genotype. Because these Z0 individuals were destined to develop  
 181 as females without tet treatment, wFem is likely to be responsible for female sex

determination. Further evidence in support of this idea was obtained by examining the sex-specific splicing products of *dsx* (**Figure 4—figure supplement 3**), a widely conserved gene responsible for sexual differentiation [14]. Similar to *B. mori* [15], C females exhibited female-specific splicing products of *E. mandarina dsx* (*Emdsx<sup>F</sup>*), whereas C males had a male-specific splicing product of *E. mandarina dsx* (*Emdsx<sup>M</sup>*; Lanes 1 and 2 in **Figure 4A**, respectively; **Figure 4B**). Similarly to C females, CF females exhibited exclusive expression of *Emdsx<sup>F</sup>* (Lanes 3 and 4 in **Figure 4A**; **Figure 4B**). Intersexual butterflies, generated by feeding the larval offspring of CF females a tet-containing larval diet, expressed both *Emdsx<sup>F</sup>* and *Emdsx<sup>M</sup>* (Lanes 5 and 6 in **Figure 4A**; **Figure 4—figure supplement 1**).

## Discussion

We provide comprehensive and conclusive indirect (qPCR of Z gene dosage) and direct (W chromosome painting; genomic analyses) evidence for the loss of the W chromosome from CF individuals. Furthermore, we demonstrate that the *Wolbachia* strain *wFem* is directly responsible for chromosomal segregation distortion (SD) by causing the disruption of sex chromosome inheritance in CF females of *E. mandarina*. This is the first empirical proof for previous theoretical predictions that cytoplasmic SGEs, such as *Wolbachia*, can cause SD. In *E. mandarina*, *wFem* has a dual role in both causing segregation distortion and feminization in Z0 lineages that have lost W chromosome and its feminizing function.

## 206 ***Wolbachia* disrupts Z chromosome inheritance in Z0 females**

207 Our data provides evidence that the exclusive production of Z0 embryos by CF  
 208 females is due to a yet unidentified developmental process that leads to the  
 209 disruption of sex chromosome inheritance in CF females prior to oviposition,  
 210 thereby the absence of maternal Z chromosome in CF offspring. This process  
 211 can be referred to as SD, according to established conceptual frameworks [5,6].  
 212 We believe that two mutually exclusive hypotheses can account for the SD  
 213 observed in CF individuals (**Figure 5A**). The first assumes that a gamete without  
 214 the maternal Z chromosome (or without any sex chromosome overall), is always  
 215 selected to become an egg pronucleus (meiotic drive *sensu stricto*) (**Figure 5A**  
 216 **left**) [16]. The second assumes that meiosis itself is normal, and that maternal Z  
 217 chromosomes (or sex chromosomes in general), are selectively eliminated from  
 218 Z-bearing gametes during, or possibly after, meiosis (**Figure 5A right**). At  
 219 present, it is unclear which of the two scenarios (meiotic drive *sensu stricto* or  
 220 elimination of the maternal Z at a later stage) is more plausible. However, it is  
 221 noteworthy that, in the moth *Abraxas grossulariata*, a matriline consisting of  
 222 putative Z0 females was observed to produce only females or a great excess of  
 223 females, and the underlying mechanism was considered to be the selective  
 224 elimination of Z chromosomes [17–20]. However, the presence of cytoplasmic  
 225 bacteria such as *Wolbachia* has not yet been examined for this moth species. If  
 226 we assume that the elimination of the maternal Z chromosome is the mechanism  
 227 of the SD in *E. mandarina*, the exceptional individual 21m (**Figure 3C**) could be  
 228 viewed as ZZ' rather than Z0, wherein Z' is a maternal Z chromosome that was  
 229 only partially deleted in the position including *Tpi* and *Ket* by the incomplete

action of *wFem*. It is possible to further speculate that the presence of *wFem* results in the elimination of sex chromosomes in general (Z or W chromosomes) and, therefore, the absence of W chromosomes in CF females may also be a direct effect of *wFem*.

### **The feminizing effect of *Wolbachia* compensates for the loss of the W chromosome in Z0 individuals**

In general, lepidopterans species with Z0/ZZ sex chromosome constitution are considered to determine their sexes by Z-counting mechanisms, wherein ZZ is male and Z0 is female [21,22]. However, the appearance of the male phenotype in Z0 individuals of *E. mandarina* after antibiotic treatment suggests that *wFem* in Z0 individuals compensates for the loss of W and its feminizing function (**Figure 5B**). We speculate that the W chromosome of *E. mandarina* acts as an epistatic feminizer. In *B. mori*, the W chromosome – more specifically, a piRNA located on the W chromosome – acts as an epistatic feminizer by silencing *Masculinizer* on the Z chromosome [23].

Reduced survival of Z0 individuals or their offspring after antibiotic treatment of larvae or adults, respectively, may suggest improper dosage compensation in Z0 males. Improper dosage compensation was also proposed to be the cause of male- and female-specific lethality in *Wolbachia*-infected and cured lines of *Ostrinia* moths [24–27].

### **How did the coordinated dual effects of *Wolbachia* evolve?**

We demonstrated that *wFem* causes SD and feminization in *E. mandarina* in two

254 steps (**Figure 5B**). This is similar to the dual role of *Wolbachia* and *Cardinium* in  
 255 haplodiploid parasitoid wasps where they induce thelytokous parthenogenesis in  
 256 a two-step mechanism, comprising diploidization of the unfertilized egg followed  
 257 by feminization [28,29]. Here, we develop the potential evolutionary scenario  
 258 that led to the appearance of both effects in *E. mandarina* (**Figure 6**). A WZ  
 259 female *Eurema* butterfly may have acquired *wFem* that exerted a feminizing  
 260 effect on ZZ males. The feminizing effect was lethal to ZZ individuals because of  
 261 improper dosage compensation, as evident in *Wolbachia*-infected *Ostrinia*  
 262 moths (**Figure 6A**) [26,27]. This could be viewed as a manipulation similar to a  
 263 male-killing phenotype [30,31]. However, the feminizing effect of *wFem* was  
 264 redundant in WZ females where the W chromosome acted as a female  
 265 determiner [23]. Conversely, the function of W had also become redundant in CF  
 266 individuals and this could have led to the loss of the W chromosome and the rise  
 267 of a Z0 lineage (**Figure 6B**). Similarly, in *Ostrinia* moths, a female-determining  
 268 function is thought to have been lost from the W chromosome in  
 269 *Wolbachia*-infected matriline [25]. Spontaneous loss of a nonfunctional W  
 270 chromosome may be easier than expected: in a wild silkworm *Samia cynthia*, the  
 271 W chromosome does not have a sex-determining function, and Z0 females are  
 272 frequently obtained in experimental crosses between subspecies [32].  
 273 *Wolbachia* has previously been found to be involved in the loss and birth of W  
 274 chromosomes in the woodlouse *Armadillidium vulgare* [33,34]. However, in *A.*  
 275 *vulgare* it has not yet been tested whether *Wolbachia* interferes with  
 276 chromosome segregation and inheritance as we have mechanistically  
 277 demonstrated it for *E. mandarina*; i.e., after the loss of the W chromosome in CF

lineages, *Wolbachia* then acquired a novel function that affected female oogenesis and resulted in SD (**Figure 6C**). It is unlikely that SD arose prior to the feminization function of *Wolbachia*: if the appearance of SD were to precede the loss of the W chromosome, the feminizing or female-determining function would become unnecessary for *Wolbachia* because there would be no males. In the short term, disruption of Z chromosome inheritance in females in a female-heterogametic species represents a great advantage to cytoplasmic symbionts because all vertically transmitted symbionts gain the opportunity to survive. However, males are still required for fertilization, and fixation of the symbionts in the host population will inevitably lead to the extinction of both the symbionts and the hosts [35]. In the long term, suppressors against sex ratio distortion, as has been observed for the male-killing phenotypes in the butterfly *Hypolimnas bolina* or a ladybird beetle [36,37], can be expected to evolve in the host. However, the evolutionary outcomes of the suppression of a combined SD and feminization would be different from that of male-killing suppression, because it would lead to all-male progeny, resulting in the loss of the matriline that inherits the feminizing and sex-distorting *Wolbachia*. This process thereby selects for an increased frequency of WZ females.

## Concluding remarks

In summary, we demonstrate for the first time that the manipulation of sex chromosome inheritance and cytoplasmically induced SD can be added to the repertoire of host manipulations induced by *Wolbachia*. Therefore, the host effects of this bacterium are far more diverse and profound than previously

appreciated. Disentangling these complex interactions between insects and *Wolbachia* may provide further exciting discoveries in the areas of host–parasite interactions, endosymbiosis as well as cell and chromosome biology in years to come, and perhaps also provide new avenues for pest population control.

## Materials and methods

### Collection and rearing of *E. mandarina*

Female adults of *E. mandarina* (Lepidoptera: Pieridae) were collected on Tanegashima Island, Kagoshima, Japan (**Figure 1—figure supplement 1**). In the laboratory, each female was allowed to lay embryos on fresh leaves of *Lespedeza cuneata* (Fabales: Fabaceae) in a plastic cup with absorbent cotton immersed with 5% honey solution. The artificial diet for larvae was prepared by mixing leaf powder of *Albizia julibrissin* (Fabales: Fabaceae) in the custom-made Silkmate (Nihon-Nosa, Yokohama, Japan) devoid of mulberry leaves. Insects were reared under the 16 h/ 8 h light /dark photoperiod at 25°C.

### Antibiotic treatment

We performed antibiotic treatment of two different stages (larval stage and adult stage) of *E. mandarina*. For larval antibiotic treatment, larvae were fed with the artificial diet (shown above) containing 0.05% tetracycline hydrochloride (tet). For adult antibiotic treatment, female adults were fed with 5% honey solution containing 0.1% tet. Specifically, CF females were mated to antibiotic-treated male offspring of C females. Antibiotic treatment of these males was performed in the larval stage and prevented CI in the crossing. After mating, each CF

female was allowed to lay embryos on fresh leaves of *L. cuneata* in a plastic cup with absorbent cotton immersed with 5% honey solution containing 0.1% tet. Fresh leaves of *L. cuneata* and cotton with tet-containing honey solution were exchanged daily.

### Diagnosis of *Wobachia* strains

To diagnose *Wolbachia* strains in *E. mandarina*, several legs of each adult were homogenized in STE buffer (10 mM Tris-HCl (pH 8.0), 1 mM EDTA (pH 8.0), 150 mM NaCl) and incubated at 56°C for 30 min followed by 92°C for 5 min. After centrifugation at 15,000 rpm for 2 min, the supernatant was used for polymerase chain reaction (PCR) using different primer pairs. The primer pair wsp81F (5'-TGGTCCAATAAGTGATGAAGAAAC-3') and wsp691R (5'-AAAAATTAAACGCTACTCCA-3') amplifies a ca. 610-bp fragment of the *Wolbachia* *wsp* gene [38]. The primer pair wsp81F and HecCIR (5'-ACTAACGTCGTTTTGTTTAG-3') amplifies a 232-bp fragment of the *wsp* gene of *wCl*, while the primer pair HecFemF (5'-TTACTCACAATTGGCTAAAGAT-3') and the wsp691R amplifies a 398-bp fragment of *wsp* gene of *wFem* [11,39].

### Whole genome sequencing and de novo assembly

We performed whole genome sequencing for three types of *E. mandarina* individuals (CF females, C females and C males) that were collected on Tanegashima Island, Japan (**Figure 1—figure supplement 1**). Six genomic DNA libraries (two libraries for each sample type derived from two individuals)

350 were constructed following manufacturer's instructions (<http://www.illumina.com>).  
 351 The average insert size of the libraries was approximately 350 bp and each  
 352 library was multiplexed using a single indexing protocol. The genomic DNA  
 353 libraries were sequenced by Illumina MiSeq using MiSeq Reagent Kit v3  
 354 (600-cycle) (Illumina, San Diego, CA). Generated raw reads (8.31 Gb, 5.34 Gb,  
 355 and 6.94 Gb for CF females, C females and C males, respectively) were filtered  
 356 by Trimmomatic [40] and then mapped to the complete genome of *Wolbachia*  
 357 strain wPip (GenBank: NC\_010981.1) by Bowtie2 [41]. Mapped reads were  
 358 discarded and then remaining reads of the three samples were merged and de  
 359 novo assembled by SGA assembler [42]. Generated genome contig sequences  
 360 were used for further analysis.

361

### 362 **Analysis of mapped read counts on chromosomes**

363 To verify that CF and C females have one Z chromosome, we compared  
 364 normalized mapped read counts of the three samples on Z chromosomes and  
 365 remaining chromosomes. The filtered reads of each sample were mapped to the  
 366 genome contigs by Bowtie2 (only concordantly and uniquely mapped reads were  
 367 counted) and then normalized mapped read count of each sample on each  
 368 contig was calculated based on the ratio of the number of total mapped reads  
 369 between the three samples. Nucleotide sequences of relatively long genome  
 370 contigs (length is 2 kb or more) with enough coverage (20 or more mapped  
 371 reads) were extracted and compared with the gene set A of *B. mori* [43] by blastx  
 372 search (cutoff e-value is 1e-50). Genome contigs with blastx hits were extracted  
 373 and classified into 28 chromosomes based on the location of the homologous *B.*

374 *mori* genes. For each chromosome, the average number of relative normalized  
375 mapped read counts was calculated for each sample (the number of C males  
376 was normalized to 1) using the normalized mapped read counts in the classified  
377 genome contigs, respectively.

378

### 379 **Sanger sequencing**

380 To genotype Z chromosomes, a highly variable intron of Z-linked  
381 triosephosphate isomerase (*Tpi*) gene was PCR amplified using the primers,  
382 5'-GGTCACTCTGAAAGGAGAACCACTTT-3' and  
383 5'-CACAACATTTGCCCAGTTGTTGCAA-3', located in coding regions [44]. The  
384 PCR products were treated with ExoSAP-IT® (Affymetrix Inc., Santa Clara, CA)  
385 and subjected to direct sequencing at Eurofins Genomics K.K. (Tokyo, Japan).  
386 No indels or SNPs were observed in sequence chromatograms of females;  
387 some males were heterozygous due to detected double peaks and shifts of  
388 sequence reads. By sequencing from both sides, it was possible to obtain the  
389 genotypes of males and females (**Figure 3—figure supplement 2**).

390

### 391 **FISH analysis**

392 In most lepidopteran species a conspicuous heterochromatic body is exclusively  
393 found in female polyploid nuclei. Since W derived-BAC as well as genomic  
394 probes have highlighted the W chromosomes and heterochromatin bodies in *B.*  
395 *mori* [45,46], there is no doubt that the bodies consist of the W chromosomes.  
396 The diagnosis however remains unreliable if a species of interest carries a  
397 W-autosomal translocation and/or partial deletion of the W [47,48]. Hiroki et al.

398 [10] as well as Narita et al. [12] relied on the W-body diagnosis for C and CF  
399 females and concluded that they have WZ and ZZ sex chromosome  
400 constitutions, respectively. However, Kern et al. [13] has recently found that, on  
401 the basis of genomic qPCR designed to amplify Z-linked gene sequences (*Tpi*  
402 and *Ket*) relative to an autosomal gene (*EF-1 $\alpha$* ), both CF and C females have  
403 only one Z chromosome while males have two Z chromosomes. This finding  
404 rejected the previous conclusion that the sex chromosome constitution of CF  
405 females is ZZ [10,12] but was inconclusive about whether CF females have a Z0  
406 or W'Z system (with W' as a modified W that has lost the feminization function  
407 and cannot be detected by the W-body assay). Hence we carried out more  
408 extensive chromosome analysis (other than just the W-body) to directly prove  
409 whether CF females carry the W or not.

410 In Lepidoptera, the W chromosome can be highlighted by FISH using  
411 probes prepared from whole genomic DNA of males or females. The capability of  
412 FISH probes in detecting the W chromosome is due to the numerous repetitive  
413 short sequences occupying the W chromosome, which is then prone to be  
414 hybridized by random sequences. Genomic probes also paint repetitive regions  
415 scattered across other chromosomes, albeit at a lower density (autosomes and  
416 Z chromosome). Here we made mitotic and pachytene chromosome  
417 preparations from wing discs and gonads, respectively, in the last instar larvae of  
418 C and CF individuals of *E. mandarina* (see [49] for details). Genomic DNA was  
419 extracted from tet-treated C female larvae. Insect telomeric repeats were  
420 amplified by non-template PCR [50]. *Kettin* (*Ket*) gene fragments were amplified  
421 from adult cDNA synthesized by PrimeScript™ RT reagent Kit (TaKaRa, Otsu,

Japan) and cloned by TOPO<sup>®</sup> TA Cloning<sup>®</sup> Kit (Thermo Fisher Scientific, Waltham, MA). We used 4 pairs of primers, Em\_kettin\_F1: 5'–AGGTAATCCAACGCCAGTCG–3' and Em\_kettin\_R1: 5'–TGCTTGCCCTAAGGCATTGT–3', Em\_kettin\_F2: 5'–ACAATGCCTTAGGGCAAGCA–3' and Em\_kettin\_R2: 5'–TGGGCAAAGCCTCTTCATGT–3', Em\_kettin\_F3: 5'–AGATTCCGCACTACGCATGA–3' and Em\_kettin\_R3: 5'–TAAATTGTGGTGGGACGGCA–3', Em\_kettin\_F5: 5'–ACATGAAGAGGCTTTGCCCA–3' and Em\_kettin\_R5: 5'–TCATGCGTAGTGCGGAATCT–3', for PCR amplification with 94°C for 5 min followed by 35 cycles of 94°C for 30 s, 60°C for 30 s and 72°C for 3 min finalized by 72°C for 10 min. Probe labeling was done by using the Nick Translation Kit (Abbott Molecular, Des Plaines, IL). We selected Green-dUTP, Orange-dUTP (Abbott Molecular Inc.) and Cy5-dUTP (GE Healthcare Japan, Tokyo) fluorochromes for genomic DNA, *Ket* and insect telomeric repeat (TTAGG)*n* probes respectively. Hybridizations were carried out according to protocols described elsewhere [49]. Signal and chromosome images were captured with a DFC350FX CCD camera mounted on a DM 6000B microscope (Leica Microsystems Japan, Tokyo) and processed with Adobe Photoshop CS2. We applied green, red and yellow pseudocolors to signals from Green, Orange and Cy5 respectively.

443

#### 444 Quantitative polymerase chain reaction (qPCR)

445 Embryos of mated females were sampled 48 h after the oviposition and stored at

446 –80°C until DNA extraction. Embryos were individually subjected to DNA  
 447 extraction using DNeasy® Blood & Tissue Kit (Qiagen, Tokyo, Japan). Real-time  
 448 fluorescence detection quantitative PCR (qPCR) was performed using SYBR  
 449 Green and a LightCycler® 480 System (Roche Diagnostics K.K., Tokyo, Japan).  
 450 Z-linked *Tpi* was amplified using TPI-F (5'–GGCCTCAAGGTCATTGCCTGT–3')  
 451 and TPI-R (5'–ACACGACCTCCTCGGTTTTACC–3'), Z-linked *Ket* was amplified  
 452 using Ket-F (5'–TCAGTTAAGGCTATTAACGCTCTG–3') and Ket-R  
 453 (5'–ATACTACCTTTTGCGGTTACTGTC–3'), and autosomal *EF-1α* was  
 454 amplified using EF-1F (5'–AAATCGGTGGTATCGGTACAGTGC–3') and EF-1R  
 455 (5'–ACAACAATGGTACCAGGCTTGAGG–3') [13]. For each qPCR, a standard  
 456 dilution series of PCR products ( $10^8$ ,  $10^7$ ,  $10^6$ ,  $10^5$ ,  $10^4$  and  $10^3$  copies per  
 457 microliter) was included in order to estimate the absolute copy numbers of the  
 458 target sequence in the samples. To prepare standard samples, PCR products  
 459 were gel-excised and purified by Wizard® SV (Promega). Copy numbers of the  
 460 standard samples were estimated by the concentration measured by a  
 461 spectrophotometer, considering that the molecular weight of a nucleotide is 309  
 462 g/mol. For each qPCR, two replicates were performed that delivered similar  
 463 results. All qPCRs were performed using a temperature profile of 40 cycles of  
 464 95°C for 5 s, 60°C for 10 s, and 72°C for 10 s. The qPCR data were analyzed by  
 465 the Absolute Quantification analysis using the Second Derivative Maximum  
 466 method implemented in the LightCycler® 480 Instrument Operator Software  
 467 Version 1.5 (Roche).  
 468

469 **RT-PCR**

470 RNA was extracted from adult abdomens that were stored at -80°C using  
 471 RNeasy<sup>®</sup> Mini Kit (Qiagen, Tokyo, Japan). The cDNA synthesized by using  
 472 Superscript<sup>™</sup> III (Invitrogen) and Oligo(dT) was used as a template for RT-PCR.  
 473 A partial sequence of *dsx* which contains alternative splicing sites was amplified  
 474 using a primer pair, E520F (5'-GCAACGACCTCGACGAGGCTTCGCGGA-3')  
 475 and EhdsxR4 (5'-AGGGGCAGCCAGTGCGACGCGTACTCC-3') and a  
 476 temperature profile of 94°C for 2 min, 30 cycles of 94°C for 1 min, 57°C for 1 min  
 477 and 72°C for 1 min 30 s, followed by 72°C for 7 min. The sequences of seven  
 478 *dsx<sup>F</sup>* isoforms and a *dsx<sup>M</sup>* isoform were deposited in DDBJ/EMBL/Genbank  
 479 (LC215389-LC215396).

480

481

482 **Acknowledgements**

483 We thank Isao Kobayashi for help in collecting butterflies and Ranjit Kumar  
 484 Sahoo for stimulating discussion. A part of this study is supported by NIAS  
 485 technical support system at NARO.

486

487 **Additional information**

488 **Competing interests**

489 The authors declare no conflict of interest.

490

491 **Funding**

| Funder                                                                                                                          | Grant number | reference | Author                         |
|---------------------------------------------------------------------------------------------------------------------------------|--------------|-----------|--------------------------------|
| Japan Society for the Promotion of Science                                                                                      | 16K08106     |           | Daisuke Kageyama<br>Ken Sahara |
| Japan Society for the Promotion of Science                                                                                      | 16H05050     |           | Ken Sahara                     |
| The funder had no role in study design, data collection and interpretation, or the decision to submit the work for publication. |              |           |                                |

492

#### 493 **Author contributions**

494 DK, KS, designed the research; DK, MO, TS, AY, TK, SK, HK, YK, SN, MM, MR,  
495 KS, performed the research; DK, AJ, KS, analyzed the data; DK, MR, KS, wrote  
496 the paper with input from AY.

497

#### 498 **Author ORCIDs**

499 Daisuke Kageyama, <http://orcid.org/0000-0002-9026-9825>

500 Markus Riegler, <http://orcid.org/0000-0001-7363-431X>

501 Ken Sahara, <http://orcid.org/0000-0002-2436-4437>

502

#### 503 **References**

504 1. Burt A, Trivers R. *Genes in Conflict: the Biology of Selfish Genetic Elements*.  
505 Cambridge, MA: Harvard University Press; 2006.

506 2. Werren JH. Selfish genetic elements, genetic conflict, and evolutionary  
507 innovation. *PNAS* 2011;108:10863–10870. doi:

- 10.1073/pnas.1102343108
3. Jaenike J. Sex chromosome meiotic drive. *Annu. Rev. Ecol. Syst.* 2001;32:25–49. doi: 10.1146/annurev.ecolsys.32.081501.113958
4. Lindholm AK, Dyer KA, Firman RC, Fishman L, Forstmeier W, Holman L, et al. The ecology and evolutionary dynamics of meiotic drive. *Trends Ecol. Evol.* 2016;31:315–326. doi: 10.1016/j.tree.2016.02.001
5. Hurst LD. The incidences mechanisms and evolution of cytoplasmic sex ratio distorters in animals. *Biol. Rev.* 1993;68:121–194. doi: 10.1111/j.1469-185X.1993.tb00733.x
6. Beukeboom LW, Perrin N. *The Evolution of Sex Determination*. Oxford University Press; 2014.
7. Werren JH, Baldo L, Clark ME. *Wolbachia*: master manipulators of invertebrate biology. *Nat. Rev. Microbiol.* 2008;6:741–751. doi: 10.1038/nrmicro1969
8. Hiroki M, Ishii Y, Kato Y. Variation in the prevalence of cytoplasmic incompatibility-inducing *Wolbachia* in the butterfly *Eurema hecabe* across the Japanese archipelago. *Evol. Ecol. Res.* 2005;7:931–942.
9. Narita S, Nomura M, Kato Y, Fukatsu T. Genetic structure of sibling butterfly species affected by *Wolbachia* infection sweep: evolutionary and biogeographical implications. *Mol. Ecol.* 2006;15:1095–1108. doi: 10.1111/j.1365-294X.2006.02857.x
10. Hiroki M, Kato Y, Kamito T, Miura K. Feminization of genetic males by a symbiotic bacterium in a butterfly, *Eurema hecabe* (Lepidoptera: Pieridae). *Naturwissenschaften* 2002;89:167–170. doi: 10.1007/s00114-002-0303-5

- 532 11. Hiroki M, Tagami Y, Miura K, Kato Y. Multiple infection with *Wolbachia*  
533 inducing different reproductive manipulations in the butterfly *Eurema*  
534 *hecabe*. *Proc. Biol. Sci.* 2004;271:1751–1755. doi:  
535 10.1098/rspb.2004.2769
- 536 12. Narita S, Kageyama D, Nomura M, Fukatsu T. Unexpected mechanism of  
537 symbiont-induced reversal of insect sex: feminizing *Wolbachia*  
538 continuously acts on the butterfly *Eurema hecabe* during larval  
539 development. *Appl. Environ. Microbiol.* 2007;73:4332–4341. doi:  
540 10.1128/AEM.00145-07
- 541 13. Kern P, Cook JM, Kageyama D, Riegler M. Double trouble: combined action  
542 of meiotic drive and *Wolbachia* feminization in *Eurema* butterflies. *Biol.*  
543 *Lett.* 2015;11:20150095. doi: 10.1098/rsbl.2015.0095
- 544 14. Bopp D, Saccone G, Beye M. Sex determination in insects: Variations on a  
545 common theme. *Sex. Dev.* 2014;8:20–28. doi: 10.1159/000356458
- 546 15. Ohbayashi F, Suzuki MG, Mita K, Okano K, Shimada T. A homologue of the  
547 *Drosophila doublesex* gene is transcribed into sex-specific mRNA isoforms  
548 in the silkworm, *Bombyx mori*. *Comp. Biochem. Physiol. B Biochem. Mol.*  
549 *Biol.* 2001;128:145–158. doi: 10.1016/S1096-4959(00)00304-3
- 550 16. Pardo-Manuel De Villena F, Sapienza C. Nonrandom segregation during  
551 meiosis: The unfairness of females. *Mamm. Genome* 2001;12:331–339.  
552 doi: 10.1007/s003350040003
- 553 17. Doncaster L. On an inherited tendency to produce purely female families in  
554 *Abraxas grossulariata*, and its relation to an abnormal chromosome  
555 number. *J. Genet.* 1913;3:1–10. doi: 10.1007/BF02981560

- 556 18. Doncaster L. On the relations between chromosomes, sex-limited  
557 transmission and sex determination in *Abraxas grossulariata*. *J. Genet.*  
558 1914;4:1–21. doi: 10.1007/BF02981560
- 559 19. Doncaster L. The Relation between chromosomes and sex-determination in  
560 “*Abraxas grossulariata*.” *Nature* 1915;95:395. doi: 10.1038/095395a0
- 561 20. Doncaster L. Further observations on chromosomes and sex-determination  
562 in *Abraxas grossulariata*. *Q. J. Microsc. Sci.* 1922;66:397–406. doi:  
563 10.1038/095395a0
- 564 21. Traut W, Sahara K, Marec F. Sex chromosomes and sex determination in  
565 Lepidoptera. *Sex Dev.* 2007;1:332–346. doi: 10.1159/000111765
- 566 22. Sahara K, Yoshido A, Traut W. Sex chromosome evolution in moths and  
567 butterflies. *Chromosom. Res.* 2012;20:83–94. doi:  
568 10.1007/s10577-011-9262-z
- 569 23. Kiuchi T, Koga H, Kawamoto M, Shoji K, Sakai H, Arai Y, et al. A single  
570 female-specific piRNA is the primary determiner of sex in the silkworm.  
571 *Nature* 2014;509:4–6. doi: 10.1038/nature13315
- 572 24. Kageyama D, Traut W. Opposite sex-specific effects of *Wolbachia* and  
573 interference with the sex determination of its host *Ostrinia scapularis*. *Proc.*  
574 *Biol. Sci.* 2004;271:251–258. doi: 10.1098/rspb.2003.2604
- 575 25. Sugimoto TN, Ishikawa Y. A male-killing *Wolbachia* carries a feminizing  
576 factor and is associated with degradation of the sex-determining system of  
577 its host. *Biol. Lett.* 2012;8:412–415. doi: 10.1098/rsbl.2011.1114
- 578 26. Fukui T, Kawamoto M, Shoji K, Kiuchi T, Sugano S, Shimada T, et al. The  
579 endosymbiotic bacterium *Wolbachia* selectively kills male hosts by

- 580 targeting the masculinizing gene. *PLoS Pathog.* 2015;11:1–14. doi:  
581 10.1371/journal.ppat.1005048
- 582 27. Sugimoto TN, Kayukawa T, Shinoda T, Ishikawa Y, Tsuchida T. Misdirection  
583 of dosage compensation underlies bidirectional sex-specific death in  
584 *Wolbachia*-infected *Ostrinia scapulalis*. *Insect Biochem. Mol. Biol.*  
585 2015;66:72–76. doi: 10.1016/j.ibmb.2015.10.001
- 586 28. Giorgini M, Monti MM, Caprio E, Stouthamer R, Hunter MS. Feminization  
587 and the collapse of haplodiploidy in an asexual parasitoid wasp harboring  
588 the bacterial symbiont *Cardinium*. *Heredity* 2009;102:365–371. doi:  
589 10.1038/hdy.2008.135
- 590 29. Ma W-J, Pannebakker B a., van de Zande L, Schwander T, Wertheim B,  
591 Beukeboom LW. Diploid males support a two-step mechanism of  
592 endosymbiont-induced thelytoky in a parasitoid wasp. *BMC Evol. Biol.*  
593 2015;15:84. doi: 10.1186/s12862-015-0370-9
- 594 30. Dyson EA, Kamath MK, Hurst GDD. *Wolbachia* infection associated with  
595 all-female broods in *Hypolimnas bolina* (Lepidoptera: Nymphalidae):  
596 evidence for horizontal transmission of a butterfly male killer. *Heredity*  
597 2002;88:166–171. doi: 10.1038/sj.hdy.6800021
- 598 31. Harumoto T, Anbutsu H, Lemaitre B, Fukatsu T. Male-killing symbiont  
599 damages host's dosage-compensated sex chromosome to induce  
600 embryonic apoptosis. *Nat. Commun.* 2016;7:12781. doi:  
601 10.1038/ncomms12781
- 602 32. Yoshido A, Marec F, Sahara K. The fate of W chromosomes in hybrids  
603 between wild silkmoths, *Samia cynthia* ssp.: no role in sex determination

- 604 and reproduction. *Heredity* 2016;116:424–433. doi: 10.1038/hdy.2015.110
- 605 33. Rigaud T, Juchault P, Mocquard J-P. The evolution of sex determination in  
606 isopod crustaceans. *BioEssays* 1997;19:409–416. doi:  
607 10.1002/bies.950190508
- 608 34. Leclercq S, Thézé J, Chebbi MA, Giraud I, Moumen B, Ernenwein L, et al.  
609 Birth of a W sex chromosome by horizontal transfer of *Wolbachia* bacterial  
610 symbiont genome. *PNAS* 2016;113:201608979. doi:  
611 10.1073/pnas.1608979113
- 612 35. Hatcher MJ, Taneyhill DE, Dunn AM, Tofts C. Population dynamics under  
613 parasitic sex ratio distortion. *Theor. Pop. Biol.* 1999;56:11–28. doi:  
614 10.1006/tpbi.1998.1410
- 615 36. Charlat S, Hornett EA, Fullard JH, Davies N, Roderick GK, Wedell N, et al.  
616 Extraordinary flux in sex ratio. *Science* 2007;317:214. doi:  
617 10.1126/science.1143369
- 618 37. Majerus TMO, Majerus MEN. Intergenomic arms races: Detection of a  
619 nuclear rescue gene of male-killing in a ladybird. *PLoS Pathog.*  
620 2010;6:1–7. doi: 10.1371/journal.ppat.1000987
- 621 38. Braig HR, Zhou W, Dobson SL, O'Neill SL. Cloning and characterization of a  
622 gene encoding the major surface protein of the bacterial endosymbiont  
623 *Wolbachia pipientis*. *J. Bacteriol.* 1998;180:2373–2378. doi:  
624 10.1099/0022-1317-69-1-35
- 625 39. Narita S, Nomura M, Kageyama D. Naturally occurring single and double  
626 infection with *Wolbachia* strains in the butterfly *Eurema hecabe*:  
627 transmission efficiencies and population density dynamics of each

- 628       *Wolbachia* strain. *FEMS Microbiol. Ecol.* 2007;61:235–245. doi:  
629       10.1111/j.1574-6941.2007.00333.x
- 630   40. Bolger AM, Lohse M, Usadel B. Trimmomatic: A flexible trimmer for Illumina  
631       sequence data. *Bioinformatics* 2014;30:2114–2120. doi:  
632       10.1093/bioinformatics/btu170
- 633   41. Langmead B, Salzberg SL. Fast gapped-read alignment with Bowtie 2. *Nat.*  
634       *Meth.* 2012;9:357–359. doi: 10.0.4.14/nmeth.1923
- 635   42. Simpson JT, Durbin R. Efficient de novo assembly of large genomes using  
636       compressed data structures. *Genome Res.* 2012;22:549–556. doi:  
637       10.1101/gr.126953.111
- 638   43. Suetsugu Y, Futahashi R, Kanamori H, Kadono-Okuda K, Sasanuma S,  
639       Narukawa J, et al. Large scale full-length cDNA sequencing reveals a  
640       unique genomic landscape in a lepidopteran model insect, *Bombyx mori*.  
641       *G3 Genes/Genomes/Genetics* 2013;3:1481–1492. doi:  
642       10.1534/g3.113.006239
- 643   44. Jiggins CD, Linares M, Naisbit RE, Salazar C, Yang ZH, Mallet J. Sex-linked  
644       hybrid sterility in a butterfly. *Evolution* 2001;55:1631–1638. doi:  
645       10.1111/j.0014-3820.2001.tb00682.x
- 646   45. Sahara K, Marec F, Eickhoff U, Traut W. Moth sex chromatin probed by  
647       comparative genomic hybridization (CGH). *Genome* 2003;46:339–342.  
648       doi: 10.1139/g03-003
- 649   46. Sahara K, Yoshido A, Kawamura N, Ohnuma A, Abe H, Mita K, et al.  
650       W-derived BAC probes as a new tool for identification of the W  
651       chromosome and its aberrations in *Bombyx mori*. *Chromosoma*

- 2003;112:48–55. doi: 10.1007/s00412-003-0245-5
47. Traut W, Marec F. Sex chromatin in Lepidoptera. *Q. Rev. Biol.* 1996;71:239–56. doi: 10.1086/419371
48. Abe H, Fujii T, Tanaka N, Yokoyama T, Kakehashi H, Ajimura M, et al. Identification of the female-determining region of the W chromosome in *Bombyx mori*. *Genetica* 2008;133:269–282. doi: 10.1007/s10709-007-9210-1
49. Yoshido A, Sahara K, Yasukochi Y. Chapter 6; Silkmooths (Lepidoptera). In: Sharakhov I, editor. *Protocols for Cytogenetic Mapping of Arthropod Genomes*. Boca Raton, U.S.A.: CRC Press; 2014. p. 219–256.
50. Sahara K, Marec F, Traut W. TTAGG telomeric repeats in chromosomes of some insects and other arthropods. *Chromosom. Res.* 1999;7:449–460. doi: 10.1023/A:1009297729547

## Figure legends

**Figure 1.** *E. mandarina* butterflies used in this study. **(A)** A photo of *E. mandarina* taken in Tanegashima Island. **(B)** Characteristics of three types of *E. mandarina* individuals inhabiting Tanegashima Island.

**Figure 2.** Fluorescence *in-situ* hybridization and sequence read counts for a C female, C male, and CF female *E. mandarina*. **A–C:** Mitotic complements hybridized with a genomic probe (green; green arrows) and a Z-linked *Ket* probe (red; red arrows) in a C female ( $2n = 62$ ) **(A)**, C male ( $2n = 62$ ) **(B)**, and CF female ( $2n = 61$ ) **(C)**. **D–I:** Genomic *in situ* hybridization (GISH) and FISH with a Z-linked *Ket* probe performed on interphase nuclei of *E. mandarina* C females **(D, E)**, C males **(F, G)**, and CF females **(H, I)**. **J–L:** GISH, telomere-FISH and FISH with *Ket* probe performed on pachytene complements of *E. mandarina* C females **(G, n = 31)**, C males **(H, n = 31)**, and CF females **(I, n = 31)**. Green paint signals in **A, E** and **J** revealed that C females have the W chromosome. The *Ket* probe signals (red) appeared on the Z pairing to the W in C females **(J)**, the ZZ bivalent in C males **(K)**, and the Z univalent of CF females **(L)**. The single signals were observed both in C and CF female nuclei. The signals in C females **(J)** and males **(K)** clearly showed their respective WZ and ZZ chromosome sets, and a Z0 chromosome set in CF females **(L)**. W: W chromosome; Z: Z chromosome; white arrows: *Wolbachia*-like structures. A bar represents 10  $\mu\text{m}$ . **M–O:** Relative normalized sequence read counts in CF females, C females, and C males for 67 contigs homologous to *Bombyx mori* loci on chromosome 1 (Z chromosome; **M**),

690 28 contigs homologous to *B. mori* loci on chromosome 4 (**N**), and 33 contigs  
691 homologous to *B. mori* loci on chromosome 16 (**O**), with relative read counts set  
692 to 1 (males). Details about genome sequencing are provided in Materials and  
693 Methods.

694

695 **Figure 3.** Effects of wFem on Z-linked gene dose in *E. mandarina* offspring. (**A**)  
696 Estimate of the gene dose of *Ket* (relative gene copies per copy of *EF-1α*) by  
697 genomic quantitative polymerase chain reaction (qPCR) analysis in each of the  
698 fertilized eggs laid by C females, CF females, and tetracycline (tet)-treated CF  
699 females. Each colored circle represents a single fertilized egg. Sample sizes are  
700 given in parentheses. (**B**) Offspring sex ratio of five females tet-treated prior to  
701 oviposition and three non-treated CF females. Numbers to the left of the arrows  
702 represent duration (days) of tet treatment. Blue dots and red dots represent  
703 males and females, respectively. (**C**) Estimate of the gene dose of *Ket* (relative  
704 gene copies per copy of *EF-1α*) by genomic qPCR in each of the adult offspring  
705 produced by CF females that were tet-treated during the adult stage (prior to  
706 oviposition). Each circle represents an adult offspring. Z chromosomes of these  
707 offspring individuals were genotyped as  $Z^A$ ,  $Z^B$ ,  $Z^C$  or  $Z^D$  on the basis of intron  
708 nucleotide sequence of Z-linked *Tpi*. The green arrow points to a male individual  
709 (adult) whose karyotype was considered to be Z0 but possibly ZZ' (see text for  
710 details). f: female, m: male.

711

712 **Figure 4.** Effects of wFem on splicing of the *doublesex* gene in *E. mandarina*.  
713 (**A**) Reverse-transcription polymerase chain reaction (RT-PCR) products of *E.*

714 *mandarina doublesex* (*Emdsx*) run on an agarose gel. Lane 1: C female; lane 2:  
715 C male; lanes 3 and 4: CF females; lanes 5 and 6: intersexes generated by  
716 tetracycline (tet) treatment of larvae produced by CF females; lane 7: 100-bp  
717 ladder. Females have at least seven splicing products, whereas males have a  
718 single product. **(B)** Structures of the splicing products of *Emdsx*. Translated  
719 regions are indicated by red and blue bars, untranslated regions by gray bars,  
720 and stop codons by triangles. Numbers of clones obtained by cloning the  
721 RT-PCR products are shown in the table on the right. **C–H**: color and  
722 morphology of forewings. Females are pale yellow on the dorsal side of the  
723 forewings (**C**) and do not have sex brand on the ventral side of the forewings (**F**),  
724 while males are intense yellow on the dorsal side of the forewings (**D**) and have  
725 sex brand on the ventral side of the forewings (**G**). Many of the intersexes  
726 generated by tet-treating CF larvae are strong yellow on the dorsal side of the  
727 forewings (**E**) and have faint sex brand on the ventral side of the forewings (**H**).

728

729 **Figure 5. (A)** Schematic illustration of two alternative mechanistic models of  
730 sex-chromosome segregation distortion that explain the observed data. The  
731 “Selection against Z gametes” model assumes that Z-bearing gametes are  
732 selected against during meiosis (left). The “Elimination of maternal Z” model  
733 assumes that Z chromosomes are eliminated during or after normal meiosis,  
734 while all the autosomes being intact (right). **(B)** All-female production explained  
735 by *Wolbachia*–host interaction. Effects of wFem on the development and sex  
736 determination of *E. mandarina*, and outcomes of larval versus adult tet treatment  
737 are illustrated. Asterisk: The majority of Z0 males die, but a few survived.

738

739 **Figure 6.** Hypothetical evolutionary trajectory of the *Wolbachia*–host interaction

740 in *E. mandarina*. See Discussion for details.

741 **Legends of figure supplements**

742

743 **Figure 1**

744 **Figure supplement 1.** Habitat of *E. mandarina* in Japanese archipelago. **(A)** In  
 745 this study, female adults of *E. mandarina* were collected on Tanegashima Island  
 746 (map), located ca. 40 km from the southern tip of Kyushu, Japan. Within *E.*  
 747 *mandarina*, the *Wolbachia* strain wCI is currently spreading northwards [8]  
 748 together with the mitochondrial haplotypes introgressed from a sibling species (*E.*  
 749 *hecabe*) by hybridization (hitchhiking effect; [9]). **(B)** On the basis of *Wolbachia*  
 750 infection status, *E. mandarina* females can be categorized into three groups:  
 751 uninfected females, C females (those singly infected with wCI), and CF females  
 752 (those doubly infected with wCI and wFem). These designations and their  
 753 offspring sex ratio are summarized in the table. To date, in *E. mandarina*, CF  
 754 females have only been found on Okinawa-jima Island [10,11] and Tanegashima  
 755 Island [12,39].

756

757 **Figure 2**

758 **Figure supplement 1.** Relative normalized sequence read counts for 440  
 759 contigs of *E. mandarina* that matched to *B. mori* loci on 28 chromosomes. Means  
 760 and standard errors are shown for CF females and C females while those of C  
 761 males were set to 1.

762

763 **Figure 3**

764 **Figure supplement 1.** Estimate of Z-linked gene dose of *E. mandarina*.

765 Estimate of the gene dose of *Ket* (top) and *Tpi* (bottom), relative gene copies per  
766 *EF-1α*, by genomic qPCR in each of the fertilized eggs laid by C females, CF  
767 females and tet-treated CF females. Each circle represents an egg. Each of the  
768 codes along the x-axes indicate the brood produced by a single mother.

769 **Figure supplement 2.** Genotyping of Z chromosome based on nucleotide  
770 polymorphism of *Tpi*. (A) Sequence polymorphism of *Tpi*. In our experiment, Z  
771 chromosomes were categorized into four ( $Z^A$ ,  $Z^B$ ,  $Z^C$  and  $Z^D$ ) on the basis of *Tpi*  
772 sequence. An en dash represents a gap. (B) Examples of genotyping based on  
773 *Tpi* sequence data. Red triangles represent polymorphic sites. When  $Z^B$  was  
774 paired to  $Z^A$ ,  $Z^C$  or  $Z^D$ , sequence gaps resulted in ambiguity from the position 109  
775 (shown with a red arrow).

776

#### 777 **Figure 4**

778 **Figure supplement 1.** Detection of *Emdsx* in adults that were tet-treated during  
779 various larval stages. The numbers of adults that failed to emerge from their  
780 pupal cases are shown with gray.

781 **Figure supplement 2.** (A-B) Intersexual adults generated by feeding the CF  
782 larvae with tet-containing diet. Their wings are often curled or crumpled. Most of  
783 them are trembling and cannot stand still. (C) Normal females. Their wings are  
784 neatly closed.

785 **Figure supplement 3.** (A) Amino acid sequences of female splice forms of *dsx*  
786 genes derived from *Eurema mandarina* (*Emdsx<sup>F</sup>*: LC215389) and other  
787 lepidopteran species, *Lymantria dispar* (*Lddsx<sup>F</sup>*: BAN82533), *Ostrinia scapularis*  
788 (*Osdsx<sup>F</sup>*: BAJ25851) and *Bombyx mori* (*Bmdsx<sup>F</sup>*: NP\_001036871). (B) Amino

789 acid sequences of male splice forms of *dsx* genes derived from *E. mandarina*  
790 (*Emdsx*<sup>M</sup>: LC215396), *L. dispar* (*Lddsx*<sup>M</sup>: BAN82532), *O. scapularis* (*Osdsx*<sup>M</sup>:  
791 BAJ25850), and *B. mori* (*Bmdsx*<sup>M</sup>: AHF81625). (C) Unrooted NJ tree of the *dsx*  
792 gene based on amino acid sequences. Em: *E. mandarina* (LC215389), Dp:  
793 *Danaus plexippus* (EHJ78146), Px: *Papilio xuthus* (XP\_013171086), Ob:  
794 *Operophtera brumata* (KOB69684), Bm: *B. mori* (NP\_001036871), Tv: *Trilocha*  
795 *varians* (BAS02078), Amy: *Antheraea mylitta* (ADL40853), At: *Amyelois*  
796 *transitella* (XP\_013184257), Ha: *Helicoverpa armigera* (AHF81652), Of: *Ostrinia*  
797 *furnacalis* (AHF81640), Ld: *L. dispar* (BAN82533), Am: *Apis mellifera*  
798 (ABV55180), NI: *Neodiprion lecontei* (XP\_015517992), Ar: *Athalia rosae*  
799 (XP\_012262273), Cm: *Cyclommatus metallifer* (BAO23810), Td: *Trypoxylus*  
800 *dichotomus* (BAM93344), Ot: *Onthophagus taurus* (AEX92939), Tc: *Tribolium*  
801 *castaneum* (AFQ62107), Ag: *Anopheles gambiae* (XP\_309601), Cq: *Culex*  
802 *quinquefasciatus* (AJB28478), Aa: *Aedes aegypti* (ABD96571), Md: *Mayetiola*  
803 *destructor* (AGW99160), So: *Sciara ocellaris* (CDN30082), Bc: *Bradysia*  
804 *coprophila* (CDN30080).

# FIGURE 1

A

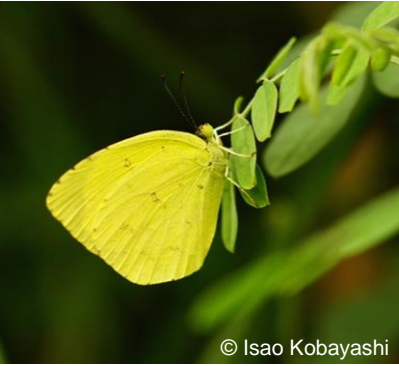

B

| Type of individuals | <i>Wolbachia</i> |     | W body | No. of Z | Predicted karyotype | Offspring sex ratio                                                    |
|---------------------|------------------|-----|--------|----------|---------------------|------------------------------------------------------------------------|
|                     | wFem             | wCI |        |          |                     |                                                                        |
| C females           | –                | +   | +      | 1        | WZ                  | -1:1                                                                   |
| C males             | –                | +   | –      | 2        | ZZ                  | -1:1 by mating with C females<br>-All-female by mating with CF females |
| CF females          | +                | +   | –      | 1        | W'Z or Z0           | -All-female                                                            |

# FIGURE 2

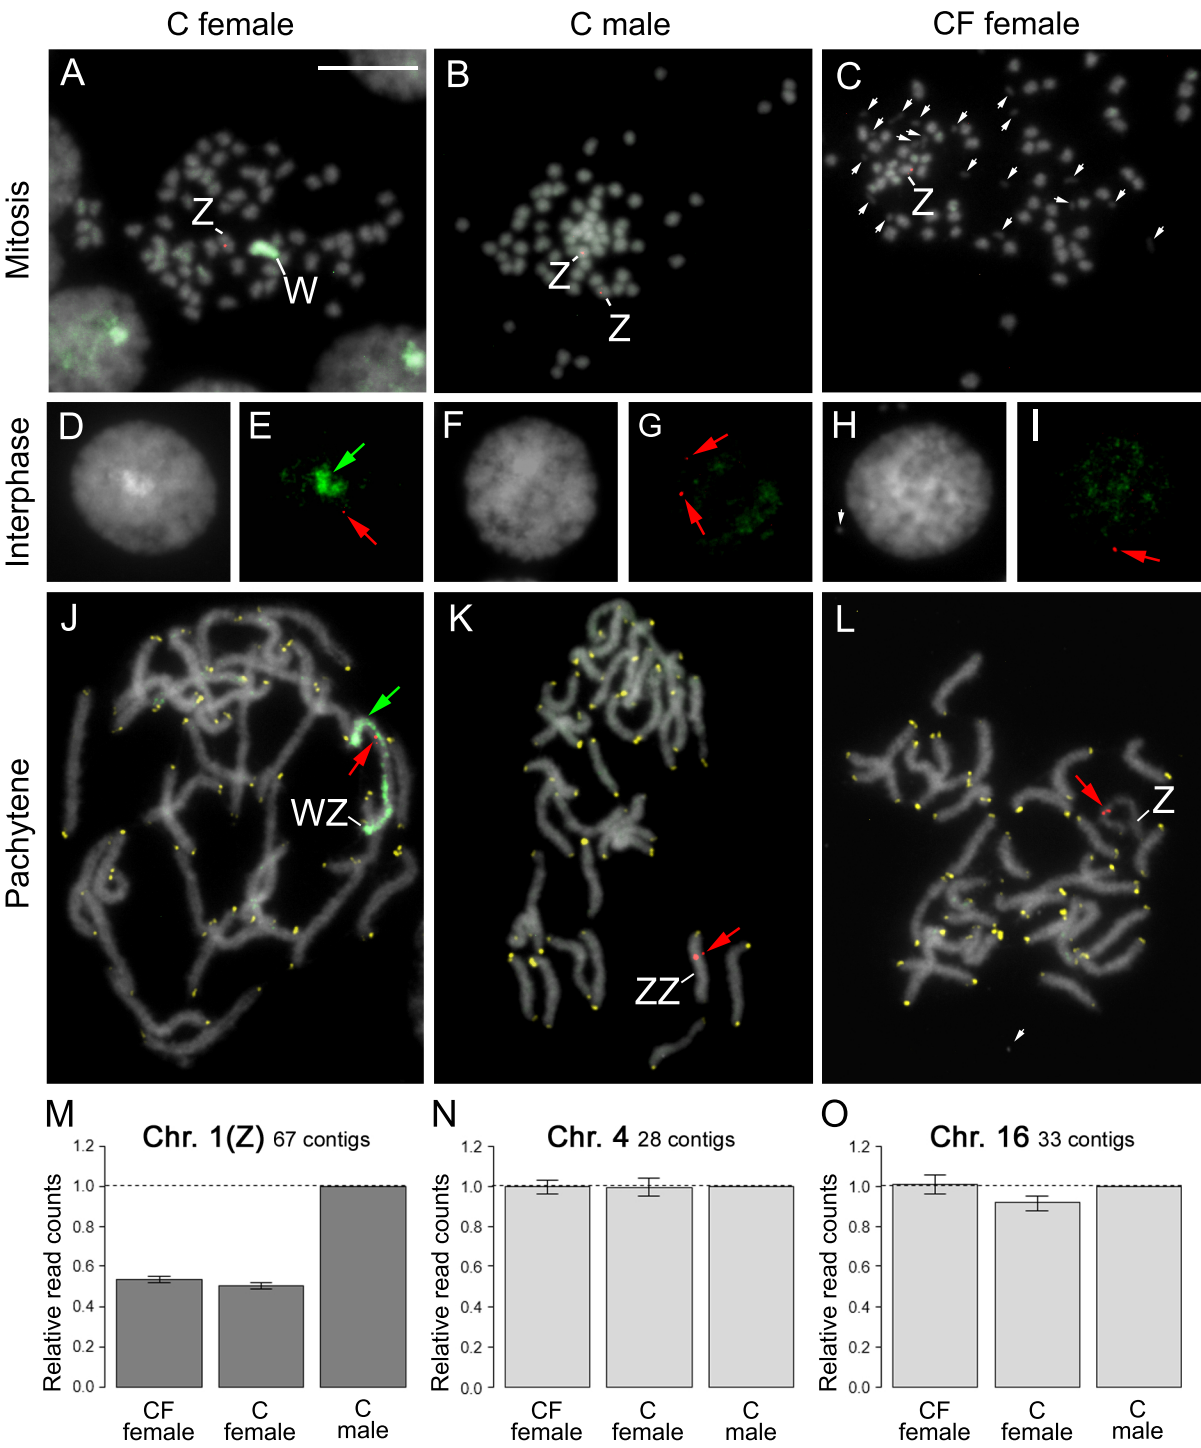

# FIGURE 3

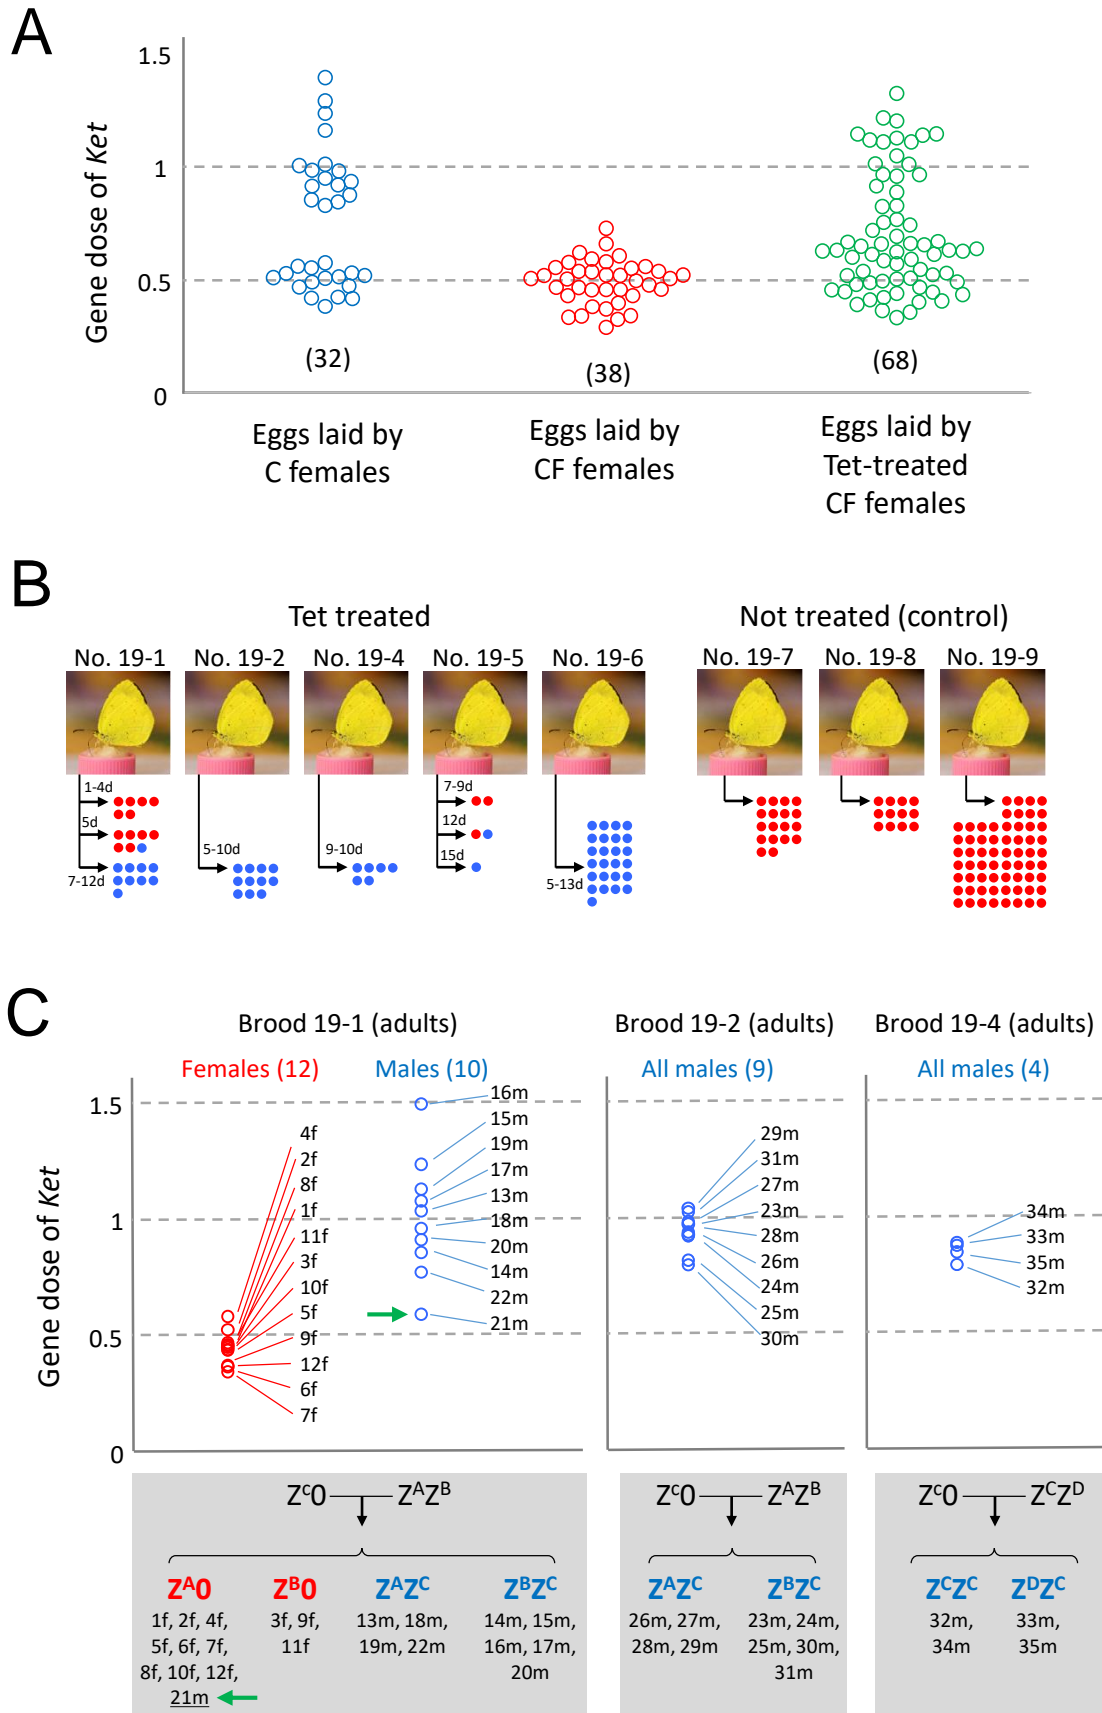

# FIGURE 4

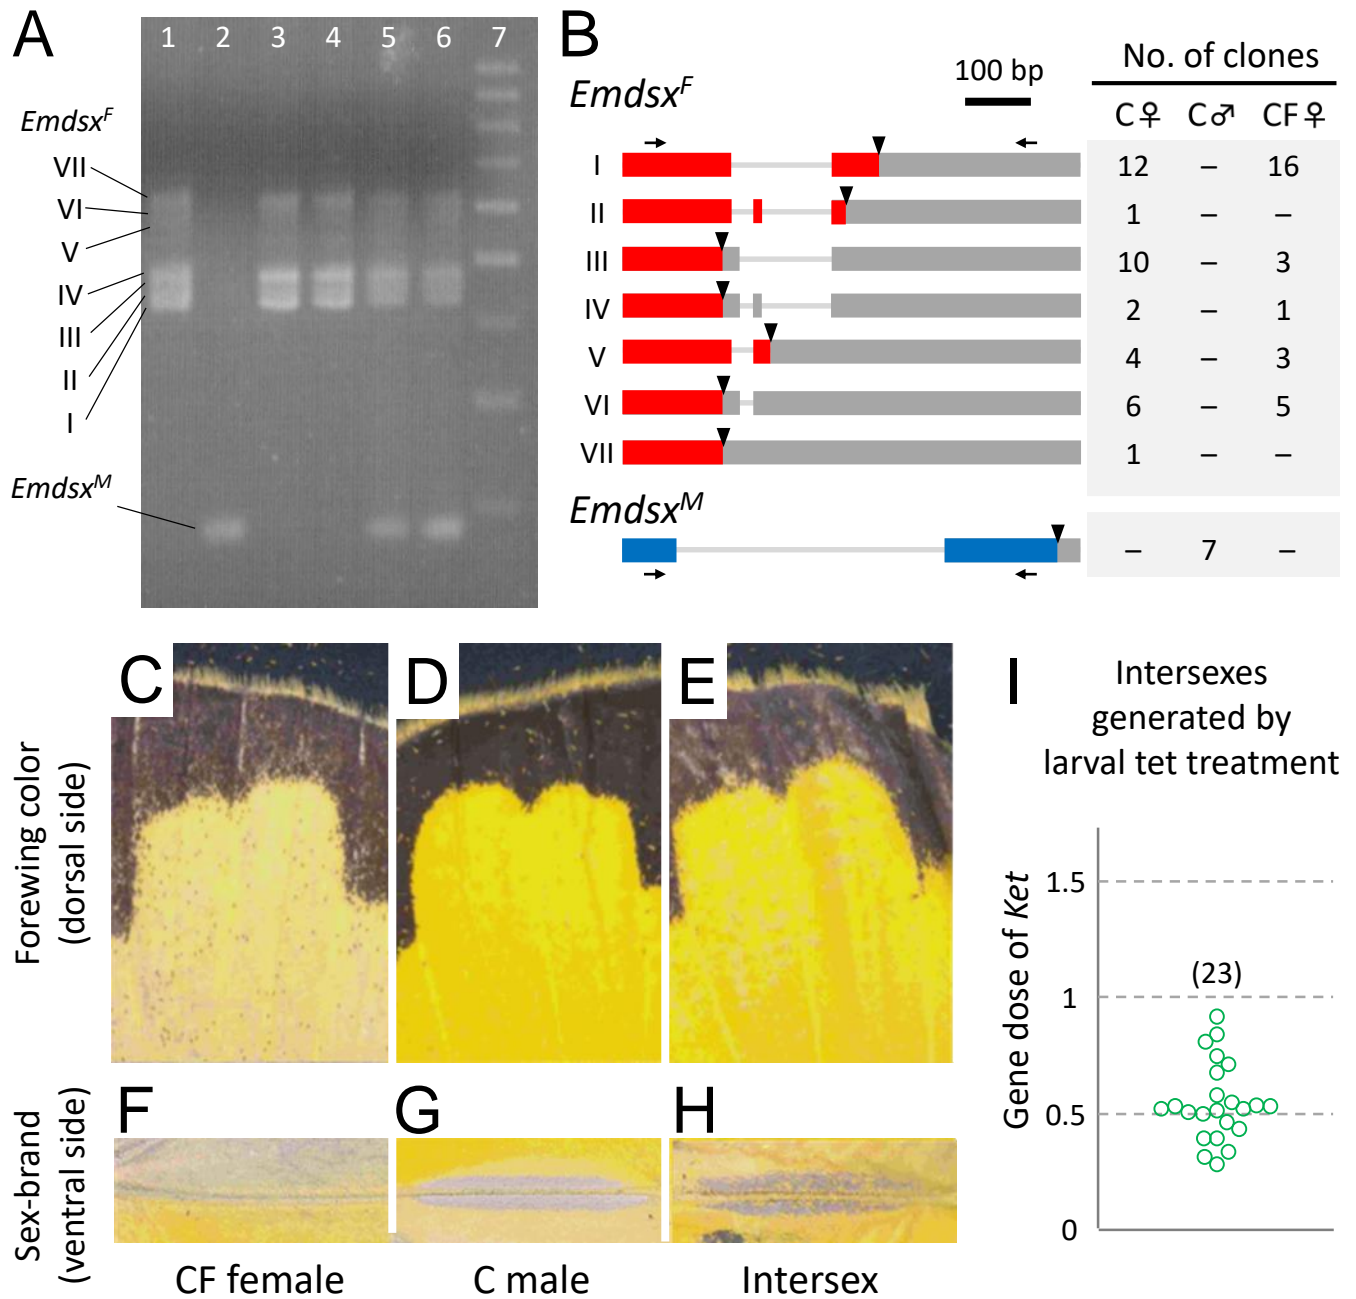

# FIGURE 5

**A**

Selection against  
Z-bearing gametes

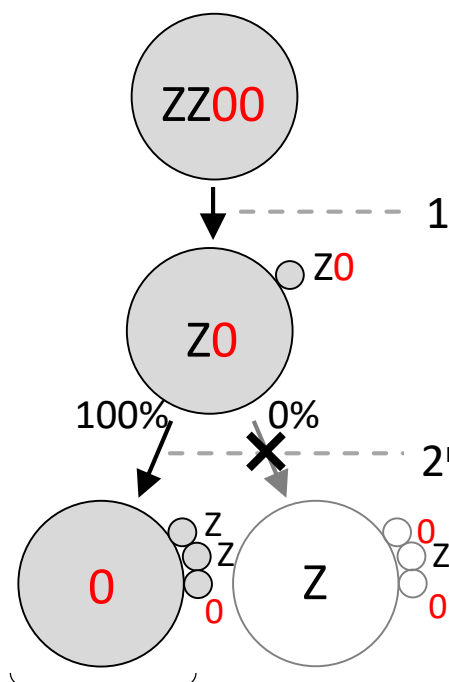

Production of 0 eggs

Elimination of  
maternal Z

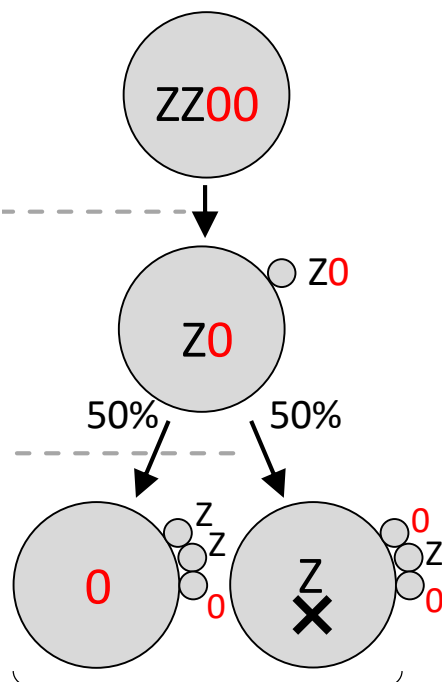

Production of 0 eggs

**B**

C matriline

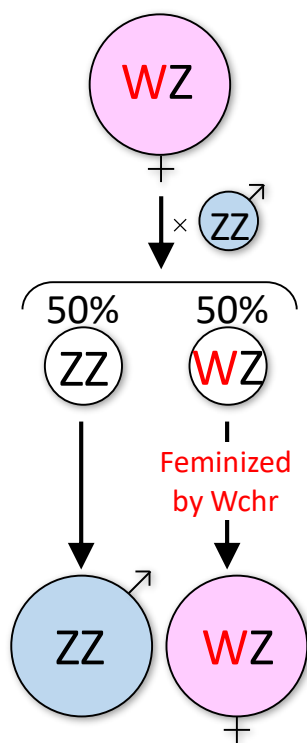

CF matriline

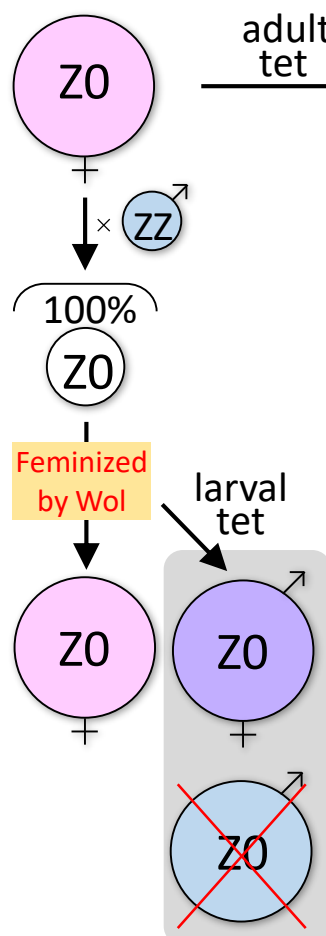

adult  
tet

larval  
tet

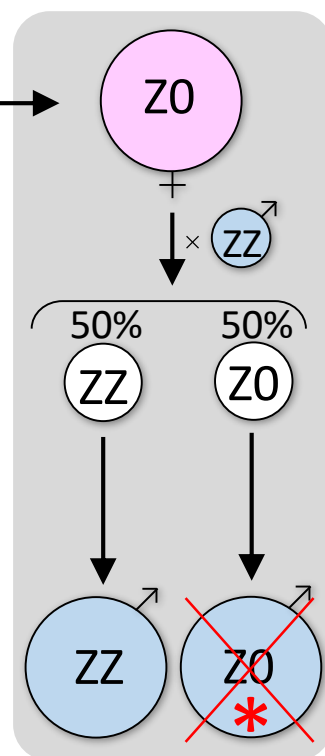

# FIGURE 6

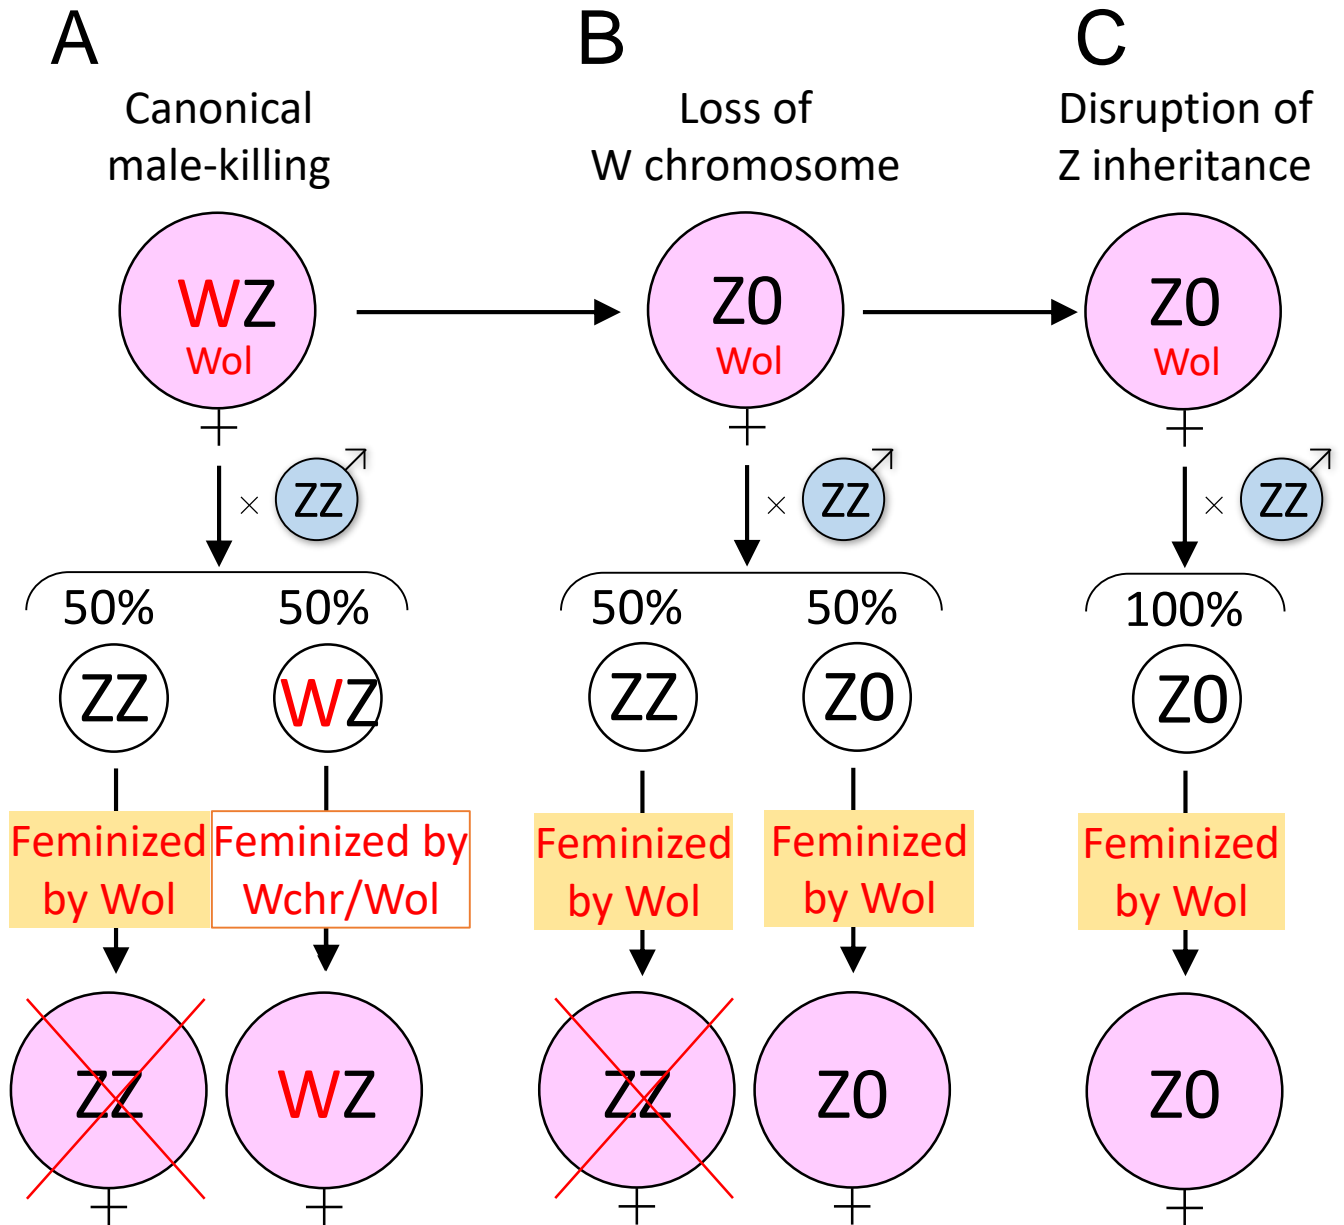

# FIGURE 1—figure supplement 1

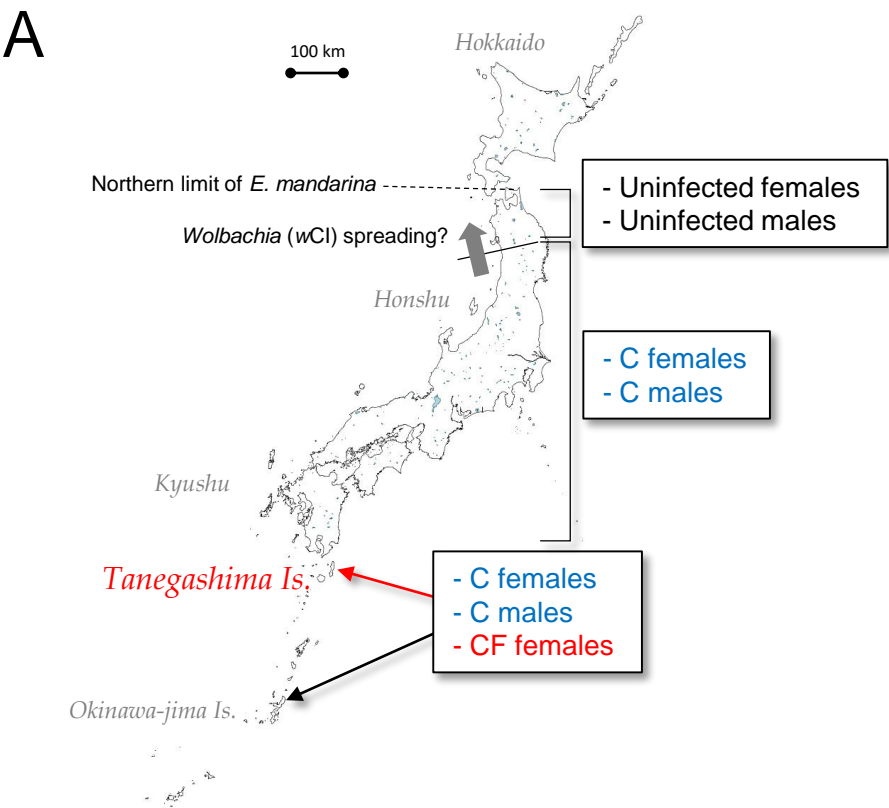

**B**

| Type of individuals          | <i>Wolbachia</i> infection status | Offspring sex ratio | Habitat                                       |
|------------------------------|-----------------------------------|---------------------|-----------------------------------------------|
| Uninfected females and males | —                                 | 1:1                 | Northern Honshu                               |
| C females and males          | wCI                               | 1:1                 | Everywhere except northern Honshu             |
| CF females                   | wCI and wFem                      | all-female          | Found in Tanegashima and Okinawa-jima Islands |

# FIGURE 2—figure supplement 1

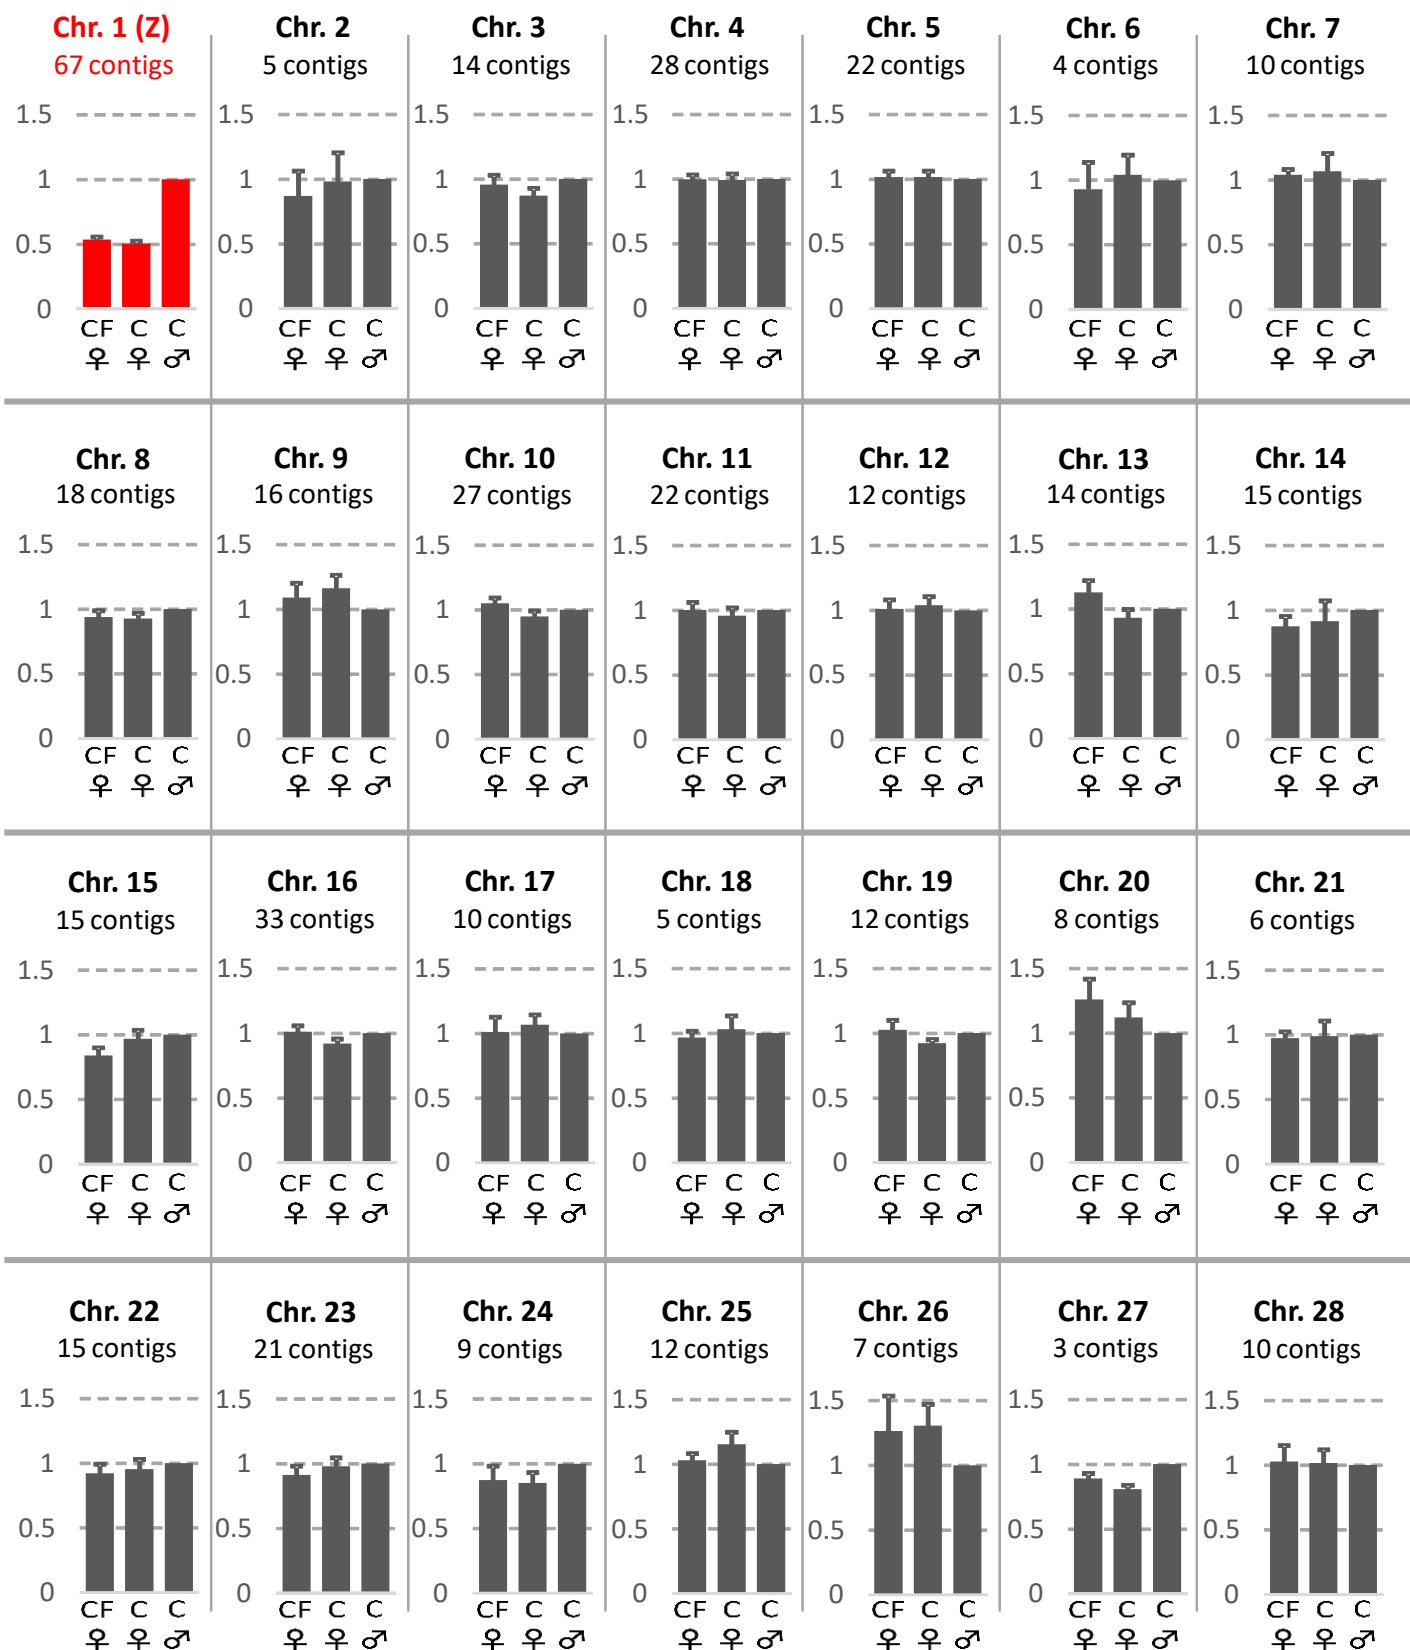

# FIGURE 3—figure supplement 1

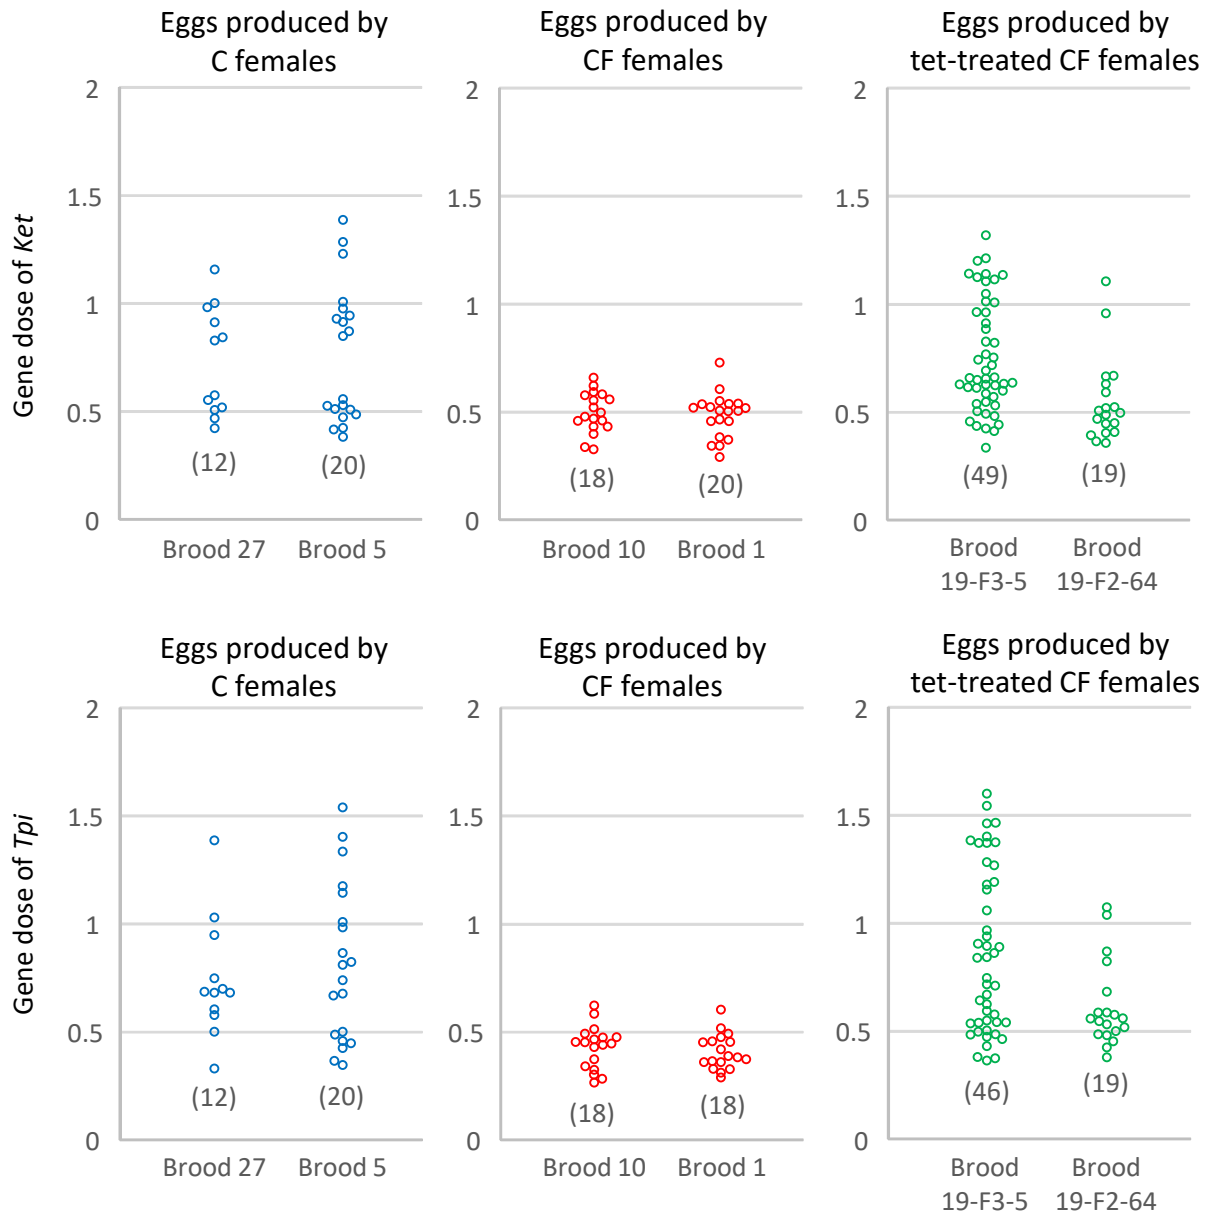

## A Sequence polymorphism of Z-linked *Tpi* gene

| Genotype of Z chromosome | Polymorphic sites |     |     |     |     |     |     |     |     |     |     |     |     |     |
|--------------------------|-------------------|-----|-----|-----|-----|-----|-----|-----|-----|-----|-----|-----|-----|-----|
|                          | 109               | 110 | 111 | 112 | 135 | 157 | 160 | 173 | 175 | 228 | 233 | 324 | 403 | 425 |
| Z <sup>A</sup>           | A                 | T   | G   | G   | A   | A   | T   | C   | T   | T   | T   | T   | C   | G   |
| Z <sup>B</sup>           | –                 | –   | –   | –   | A   | A   | C   | T   | T   | A   | T   | –   | T   | G   |
| Z <sup>C</sup>           | A                 | T   | G   | G   | G   | A   | T   | C   | T   | T   | T   | T   | T   | G   |
| Z <sup>D</sup>           | A                 | T   | G   | G   | A   | G   | C   | T   | A   | T   | G   | T   | T   | A   |

## B Examples of genotyping of sex chromosomes based on sequence data

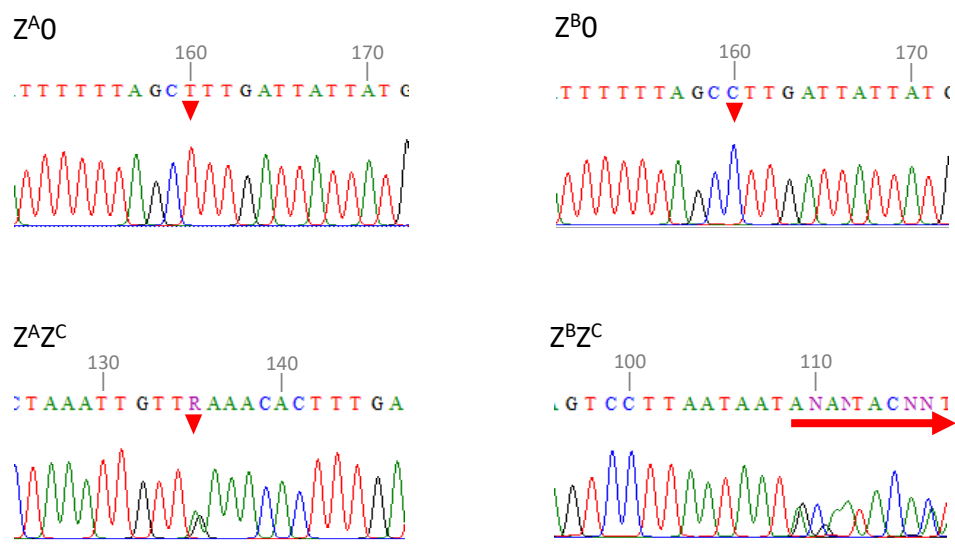

No. of adult offspring produced by CF females

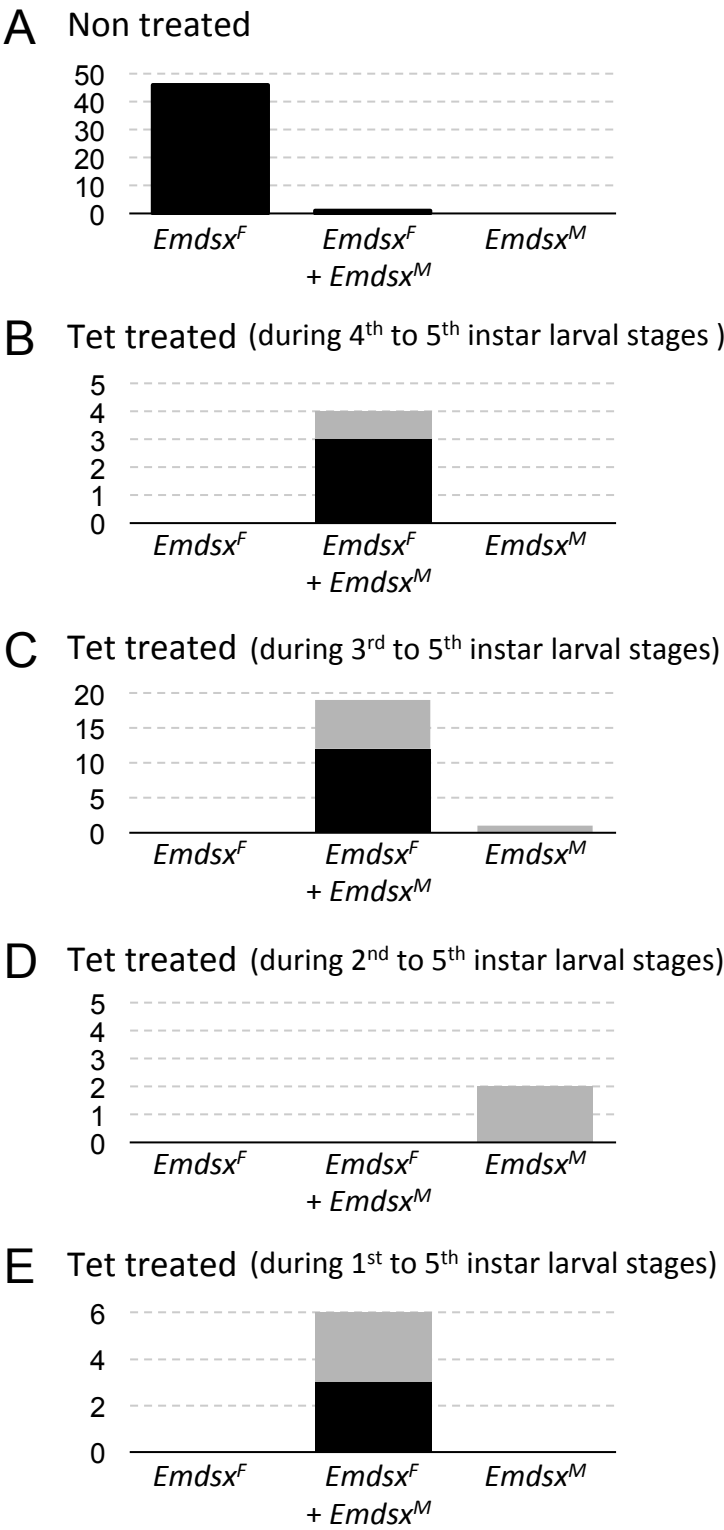

No. of adult offspring produced by C females

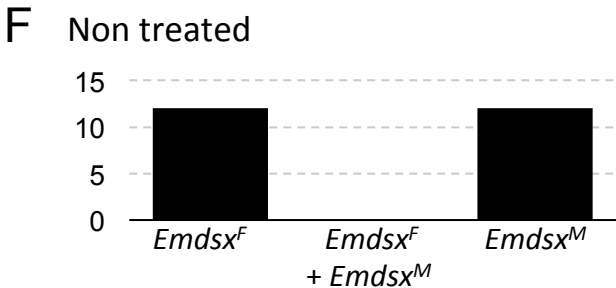

FIGURE 4—figure supplement 2

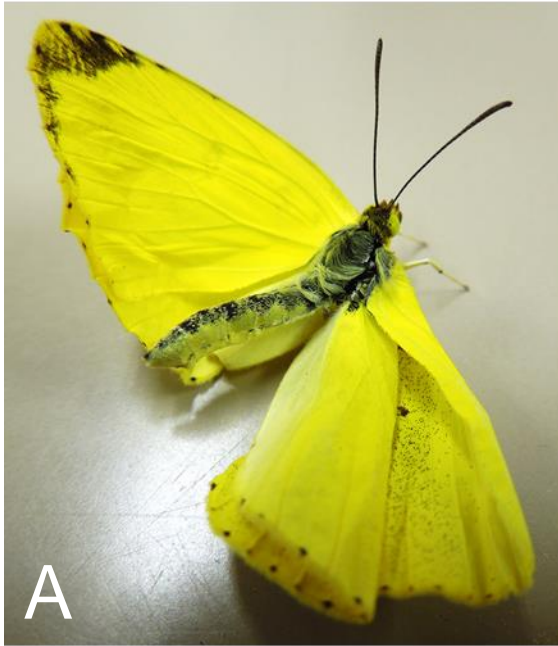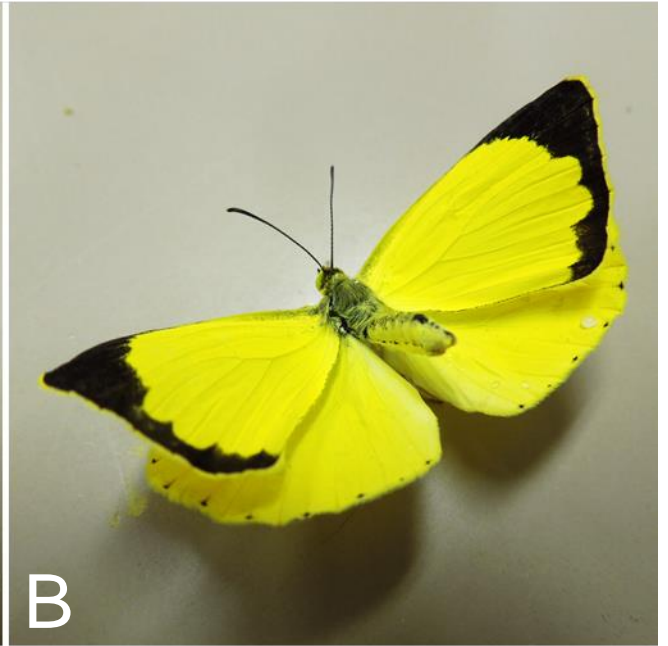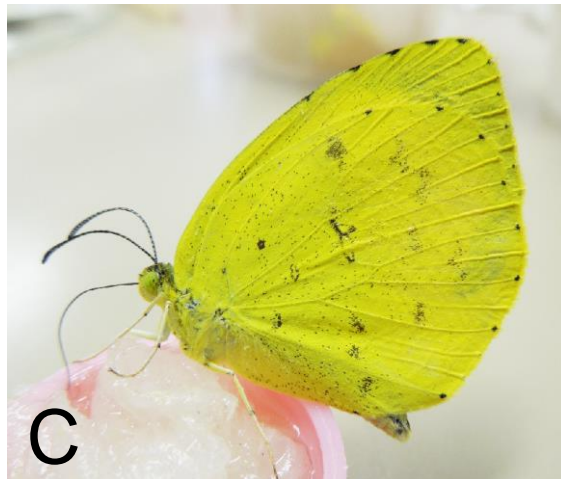

Source: http://www.biorxiv.org/content/10.1101/115386v2.full.pdf
